# Supplementary material for: Reactions of chalcogens and borane with phosphazane macrocycles assembled from diethanolamine and P2N2 building blocks
Source: Royal Society of Chemistry journal article supplement (doi:10.1039/d4dt03229b), 2025-01-01
Supplement: d4dt03229b1.pdf [file d4dt03229b1.pdf]

**Electronic Supplementary Information**

**Reactions of chalcogens and borane with phosphazane macrocycles derived  
from diethanolamine and P<sub>2</sub>N<sub>2</sub> building blocks †**

Manu Goyal, Chandrakala Negi, Nitish Kumar Garg, Shalender Jain and Sanjay Singh\*

\*Corresponding Author: [sanjaysingh@iisermohali.ac.in](mailto:sanjaysingh@iisermohali.ac.in)

Department of Chemical Sciences, Indian Institute of Science Education and Research Mohali, Knowledge City, Sector 81,  
SAS Nagar, Mohali 140306, Punjab, India.

## **Table of contents**

|                                                                              |           |
|------------------------------------------------------------------------------|-----------|
| <b>1. Heteronuclear NMR Spectra of Compounds 1-10.....</b>                   | <b>3</b>  |
| <b>2. Crystal Data and Refinement Details of Compounds 1-3, 8 and 9.....</b> | <b>24</b> |
| <b>3. References.....</b>                                                    |           |
|                                                                              | <b>26</b> |

## 1. Heteronuclear NMR Spectra of Compounds 1-10

### Heteronuclear NMR spectra of $[\{P(\mu\text{-}N^t\text{Bu})\}_2\{O(CH_2)_2N(\text{Me})(CH_2)_2O\}]_2$ (1)

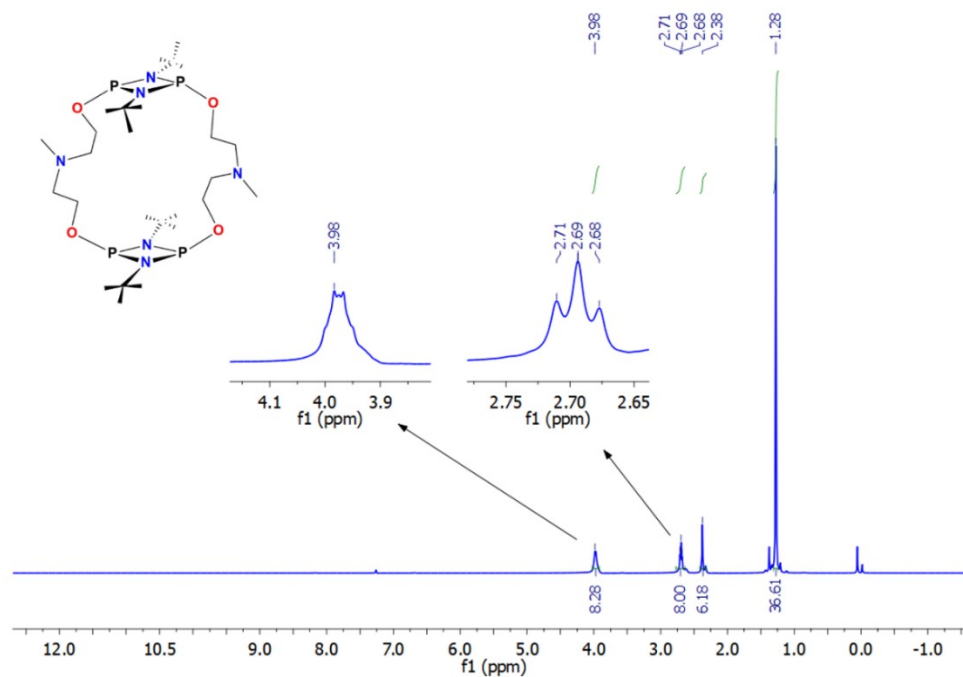

**Fig.S1**  $^1\text{H}$  NMR (400 MHz,  $\text{CDCl}_3$ ) spectrum of  $[\{P(\mu\text{-}N^t\text{Bu})\}_2\{O(CH_2)_2N(\text{Me})(CH_2)_2O\}]_2$  (1).

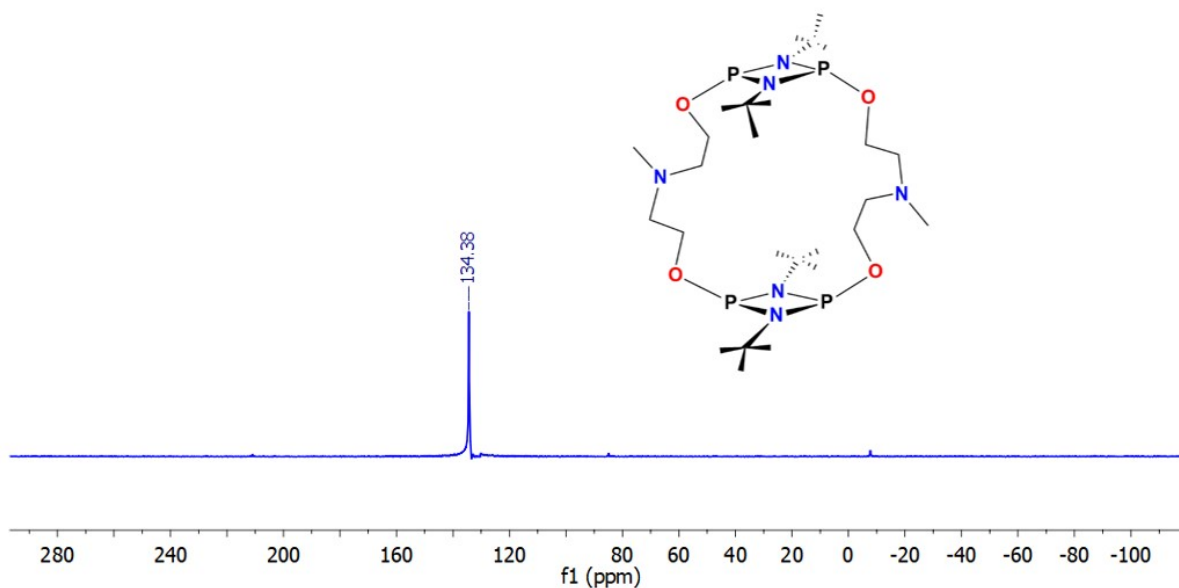

**Fig.S2**  $^{31}\text{P}\{^1\text{H}\}$  NMR (162MHz,  $\text{CDCl}_3$ ) spectrum of  $[\{P(\mu\text{-}N^t\text{Bu})\}_2\{O(CH_2)_2N(\text{Me})(CH_2)_2O\}]_2$  (1).

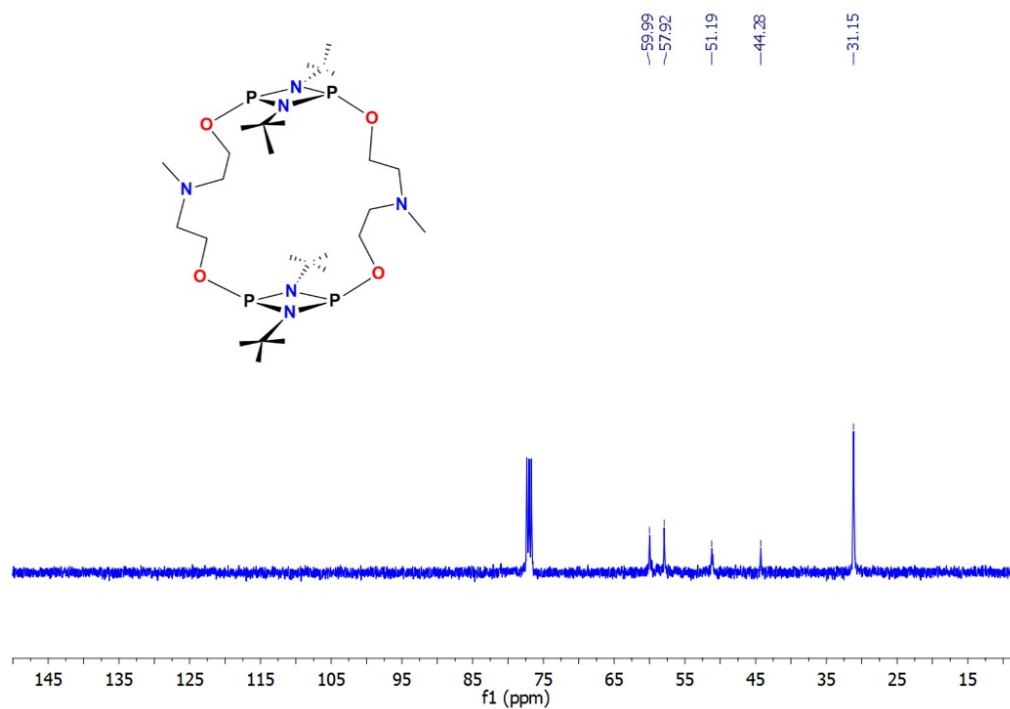

**Fig.S3**  $^{13}\text{C}\{^1\text{H}\}$  NMR (100 MHz,  $\text{CDCl}_3$ ) spectrum of  $[\{\text{P}(\mu\text{-N}^t\text{Bu})\}_2\{\text{O}(\text{CH}_2)_2\text{N}(\text{Me})(\text{CH}_2)_2\text{O}\}]_2$  (**1**).

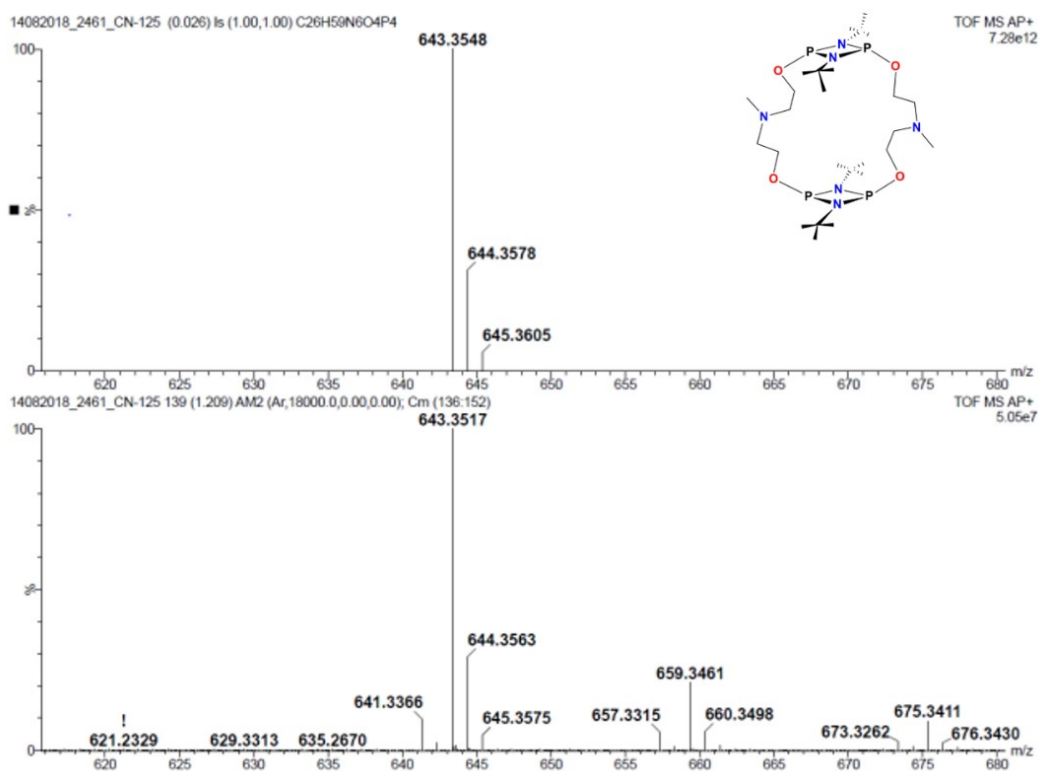

**Fig.S4** HRMS spectrum of  $[\{\text{P}(\mu\text{-N}^t\text{Bu})\}_2\{\text{O}(\text{CH}_2)_2\text{N}(\text{Me})(\text{CH}_2)_2\text{O}\}]_2$  (**1**).

**Heteronuclear NMR spectra of  $[\{\text{P}(\mu\text{-N}^t\text{Bu})\}_2\{\text{O}(\text{CH}_2)_2\text{N}(\text{Ph})(\text{CH}_2)_2\text{O}\}]_2$  (2)**

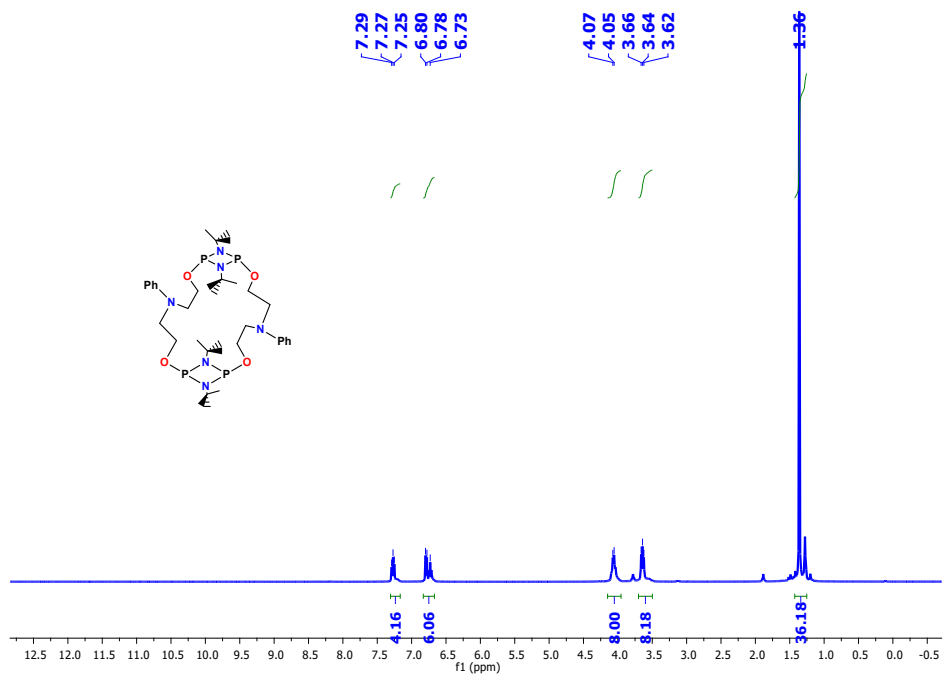

**Fig.S5**  $^1\text{H}$  NMR (400 MHz,  $\text{CDCl}_3$ ) spectrum of  $[\{\text{P}(\mu\text{-N}^t\text{Bu})\}_2\{\text{O}(\text{CH}_2)_2\text{N}(\text{Ph})(\text{CH}_2)_2\text{O}\}]_2$  (2).

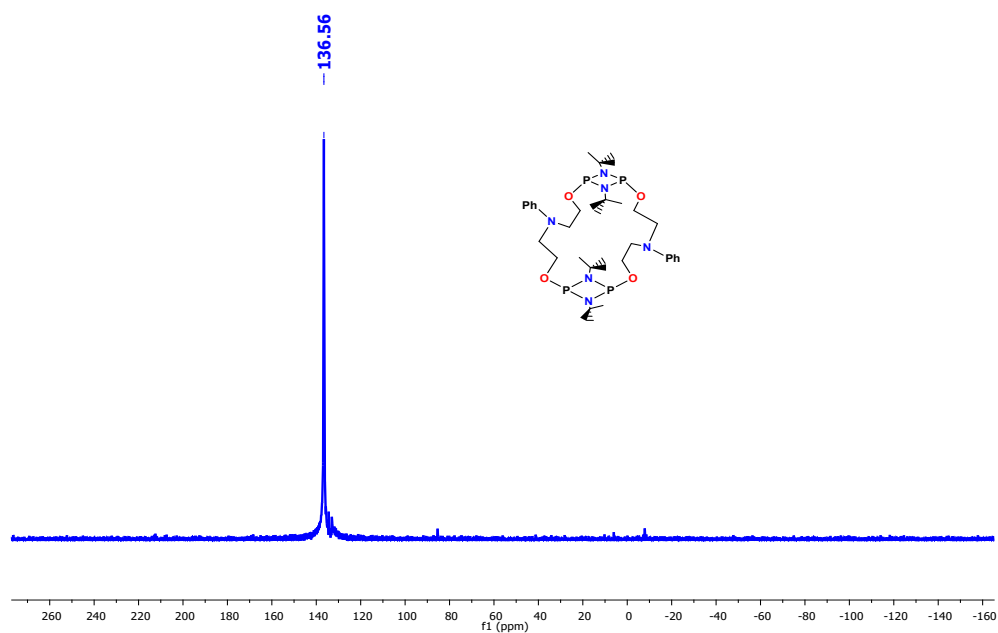

**Fig.S6**  $^{31}\text{P}\{^1\text{H}\}$  NMR (162 MHz,  $\text{CDCl}_3$ ) spectrum of  $[\{\text{P}(\mu\text{-N}^t\text{Bu})\}_2\{\text{O}(\text{CH}_2)_2\text{N}(\text{Ph})(\text{CH}_2)_2\text{O}\}]_2$  (2).

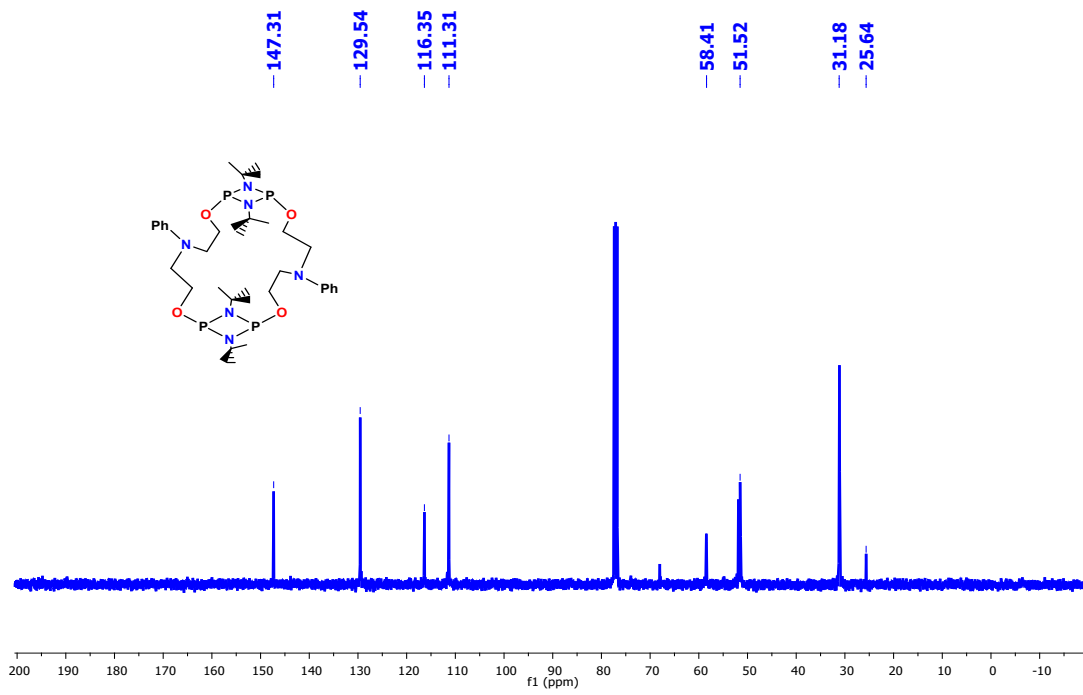



**Fig.S7**  $^{13}\text{C}\{^1\text{H}\}$  NMR (100 MHz,  $\text{CDCl}_3$ ) spectrum of  $[\{\text{P}(\mu\text{-N}^t\text{Bu})\}_2\{\text{O}(\text{CH}_2)_2\text{N}(\text{Ph})(\text{CH}_2)_2\text{O}\}]_2$  (**2**).

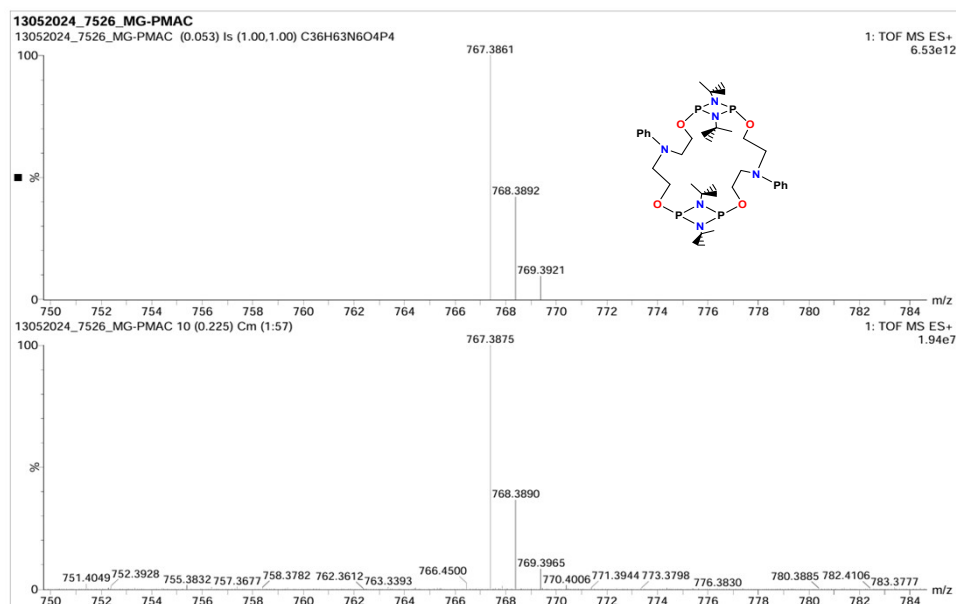

**Fig.S8** HRMS spectrum of  $[\{\text{P}(\mu\text{-N}^t\text{Bu})\}_2\{\text{O}(\text{CH}_2)_2\text{N}(\text{Ph})(\text{CH}_2)_2\text{O}\}]_2$  (**2**).

**Heteronuclear NMR spectra of  $[\{\text{O}=\text{P}(\mu\text{-N}^t\text{Bu})\}_2\{\text{O}(\text{CH}_2)_2\text{N}(\text{Me})(\text{CH}_2)_2\text{O}\}]_2$  (**3**)**

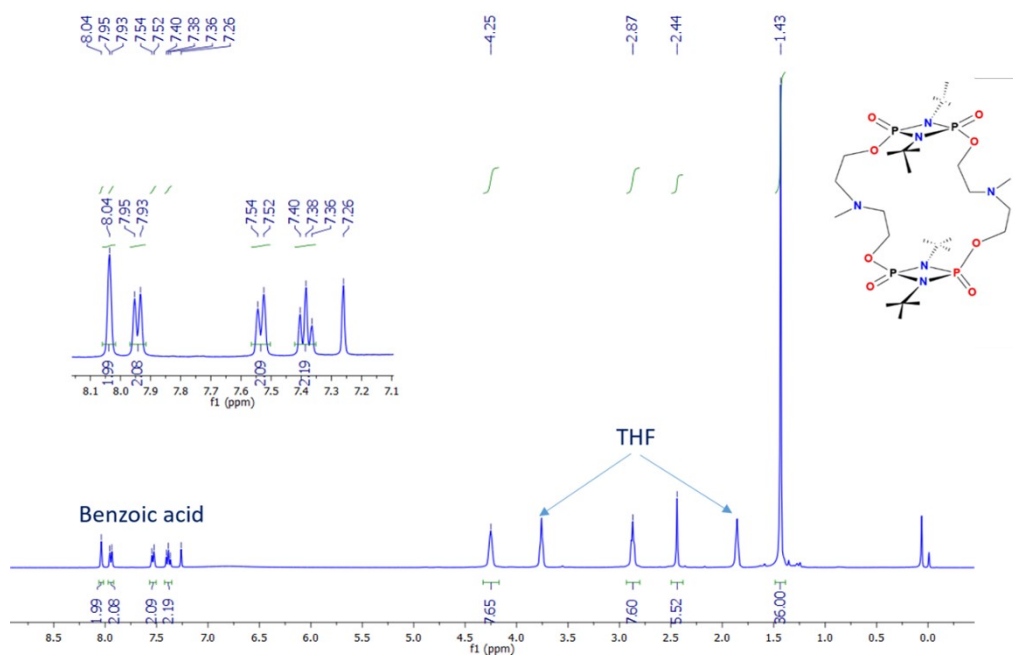

**Fig. S9** <sup>1</sup>H NMR (400 MHz, CDCl<sub>3</sub>) of [ $\{(O=)P(\mu-N^tBu)\}_2\{O(CH_2)_2N(Me)(CH_2)_2O\}_2$ ] (3).

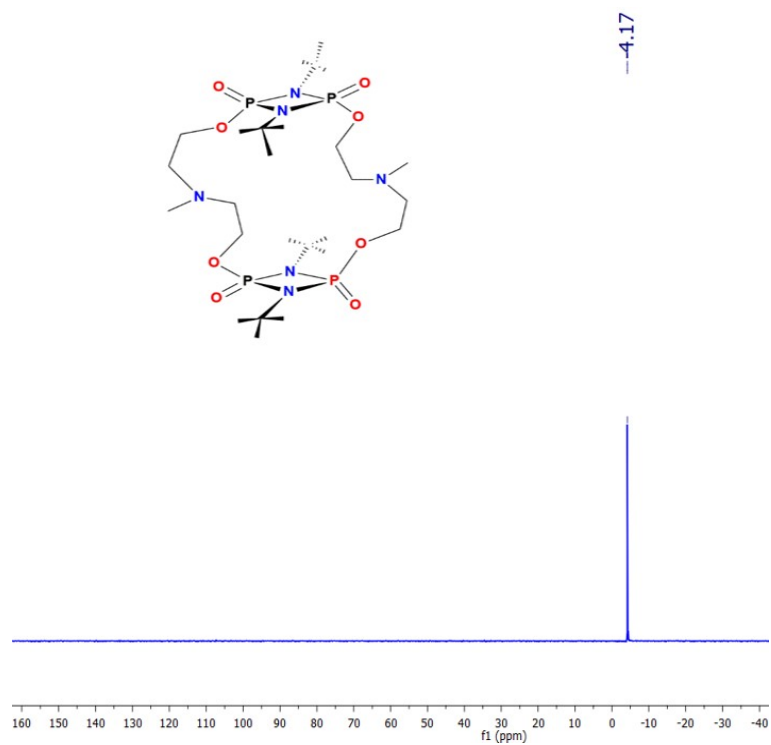

**Fig. S10** <sup>31</sup>P {<sup>1</sup>H} NMR (162 MHz, CDCl<sub>3</sub>) of [ $\{(O=)P(\mu-N^tBu)\}_2\{O(CH_2)_2N(Me)(CH_2)_2O\}_2$ ] (3).

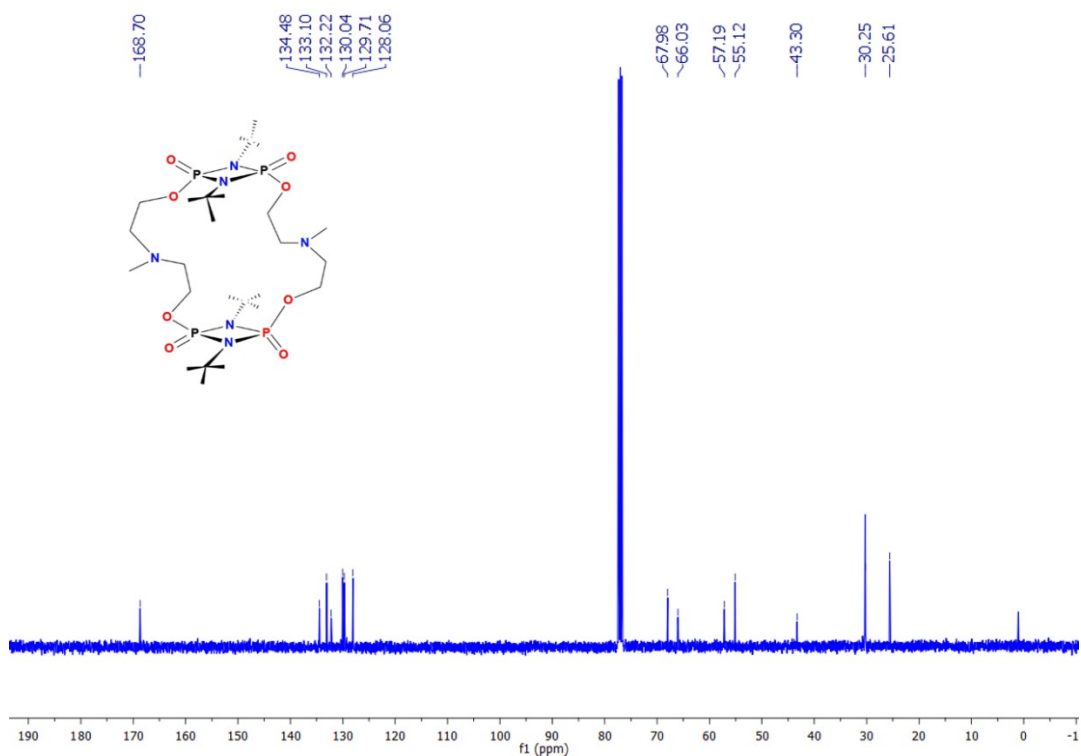

**Fig. S11**  $^{13}\text{C}\{^1\text{H}\}$  NMR (100 MHz,  $\text{CDCl}_3$ ) of  $[\{(\text{O}=\text{P}(\mu\text{-N}^t\text{Bu}))_2\{\text{O}(\text{CH}_2)_2\text{N}(\text{Me})(\text{CH}_2)_2\text{O}\}_2]$  (**3**).

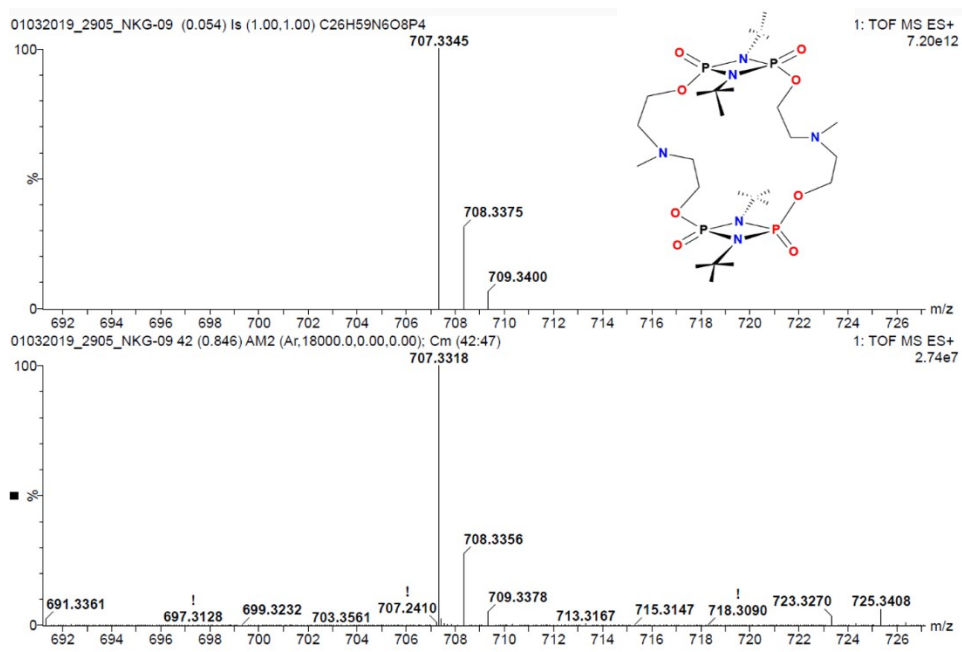

**Fig. S12** HRMS of  $[\{(\text{O}=\text{P}(\mu\text{-N}^t\text{Bu}))_2\{\text{O}(\text{CH}_2)_2\text{N}(\text{Me})(\text{CH}_2)_2\text{O}\}_2]$  (**3**).

Heteronuclear NMR spectra of  $[\{(O=)P(\mu-N^tBu)\}_2\{O(CH_2)_2N(Ph)(CH_2)_2O\}]_2$  (**4**)

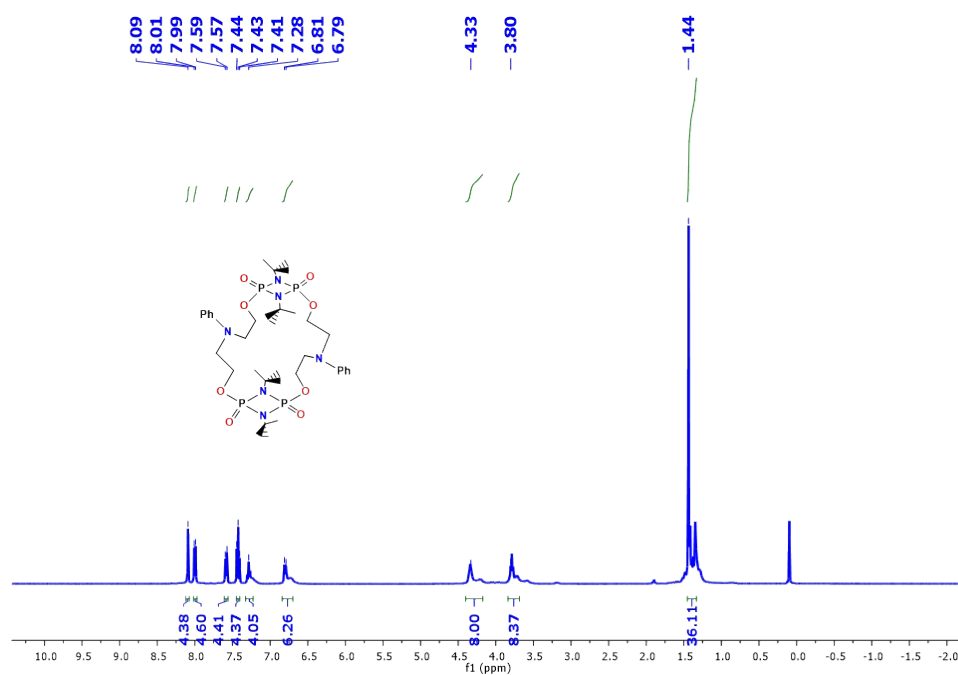

**Fig.S13**  $^1H$  NMR (400 MHz,  $CDCl_3$ ) spectrum of  $[\{(O=)P(\mu-N^tBu)\}_2\{O(CH_2)_2N(Ph)(CH_2)_2O\}]_2$  (**4**).

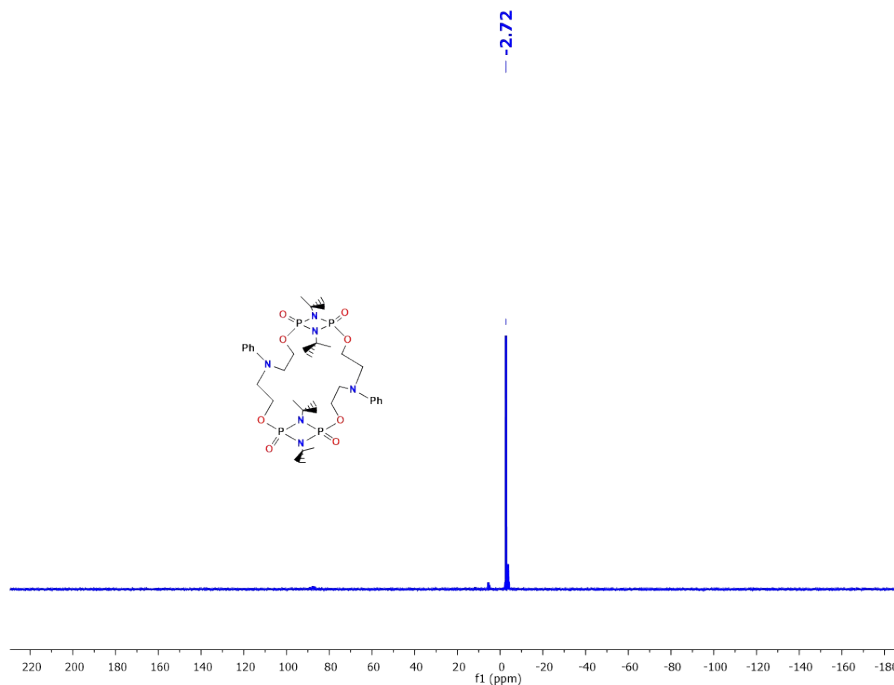

**Fig.S14**  $^{31}P\{^1H\}$  NMR (162 MHz,  $CDCl_3$ ) spectrum of  $[\{(O=)P(\mu-N^tBu)\}_2\{O(CH_2)_2N(Ph)(CH_2)_2O\}]_2$  (**4**).

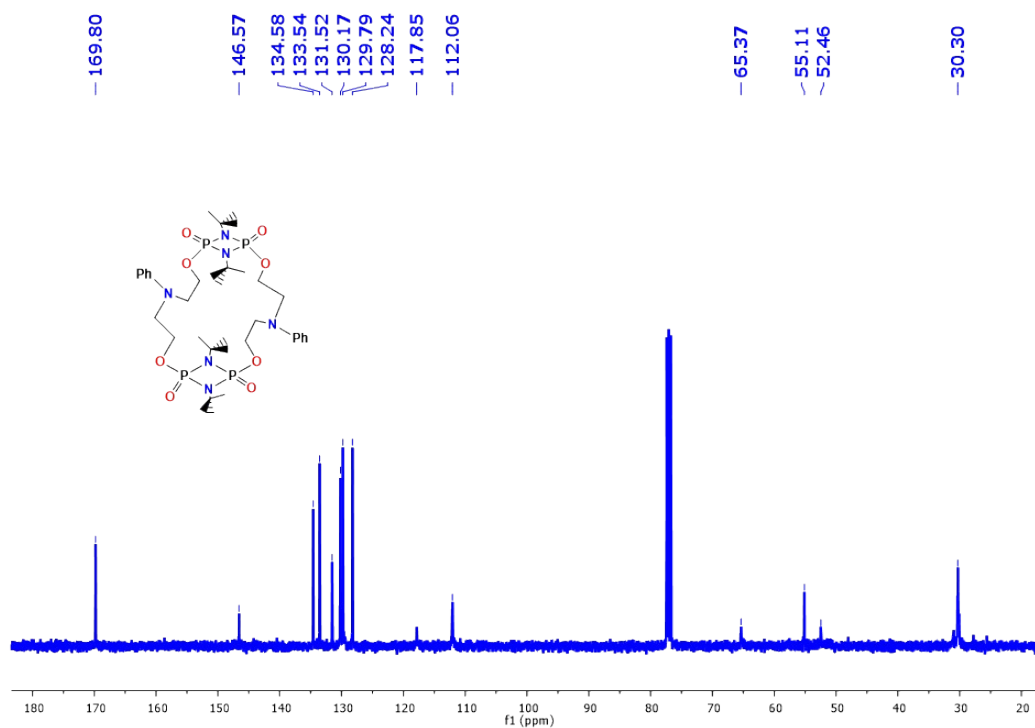

**Fig.S15**  $^{13}\text{C}\{^1\text{H}\}$  NMR (100 MHz,  $\text{CDCl}_3$ ) spectrum of  $[\{(O=)P(\mu\text{-N}^t\text{Bu})\}_2\{O(\text{CH}_2)_2\text{N}(\text{Ph})(\text{CH}_2)_2\text{O}\}]_2$  (**4**).

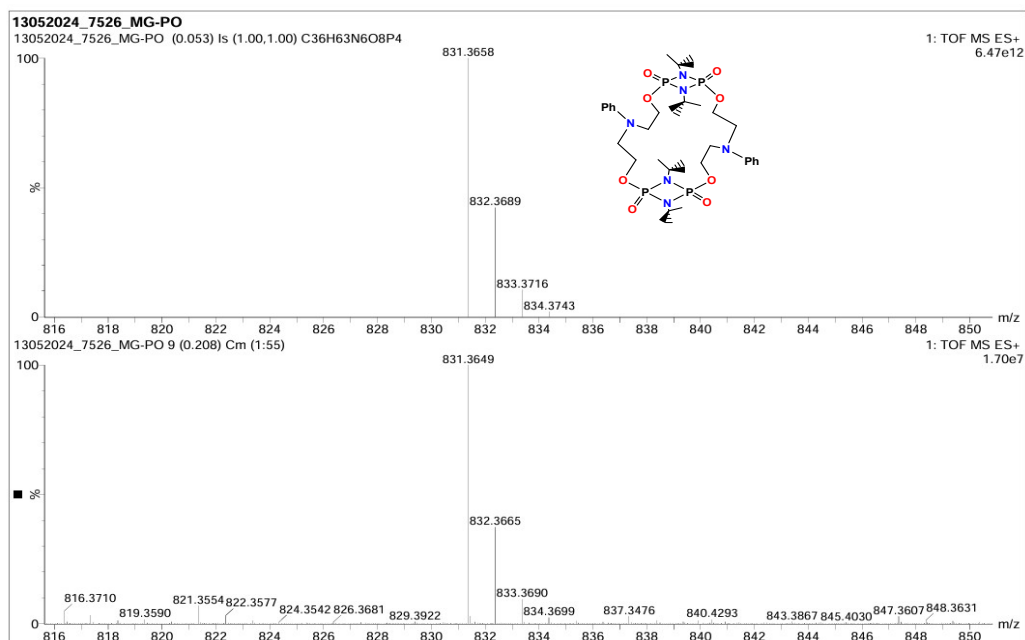

**Fig.S16** HRMS spectrum of  $[\{(O=)P(\mu\text{-N}^t\text{Bu})\}_2\{O(\text{CH}_2)_2\text{N}(\text{Ph})(\text{CH}_2)_2\text{O}\}]_2$  (**4**).

Heteronuclear NMR spectra of  $[\{(S=)P(\mu-N^tBu)\}_2\{O(CH_2)_2N(Me)(CH_2)_2O\}]_2$  (**5**)

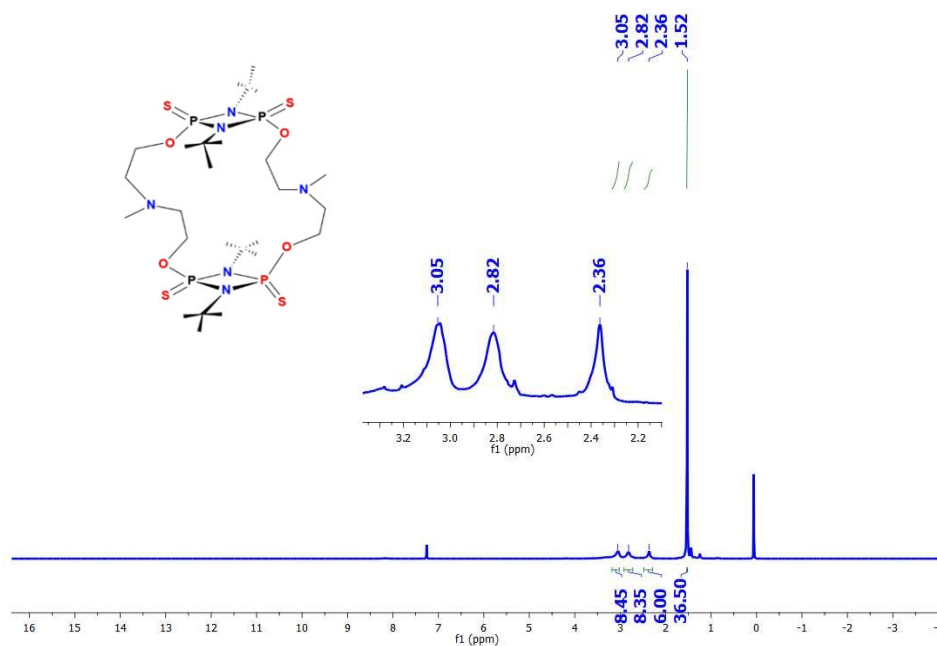

Fig. S17  $^1H$  NMR (400 MHz,  $C_6D_6$ ) spectrum of  $[\{(S=)P(\mu-N^tBu)\}_2\{O(CH_2)_2N(Me)(CH_2)_2O\}]_2$  (**5**).

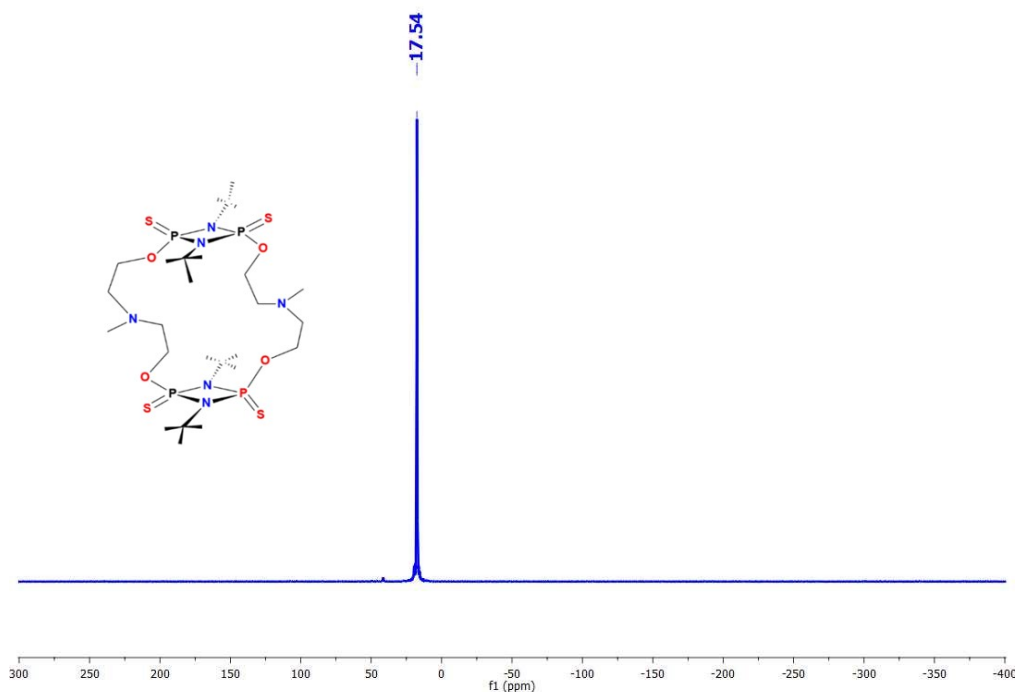

Fig.S18  $^{31}P\{^1H\}$  NMR (162 MHz,  $C_6D_6$ ) spectrum of  $[\{(S=)P(\mu-N^tBu)\}_2\{O(CH_2)_2N(Me)(CH_2)_2O\}]_2$  (**5**).

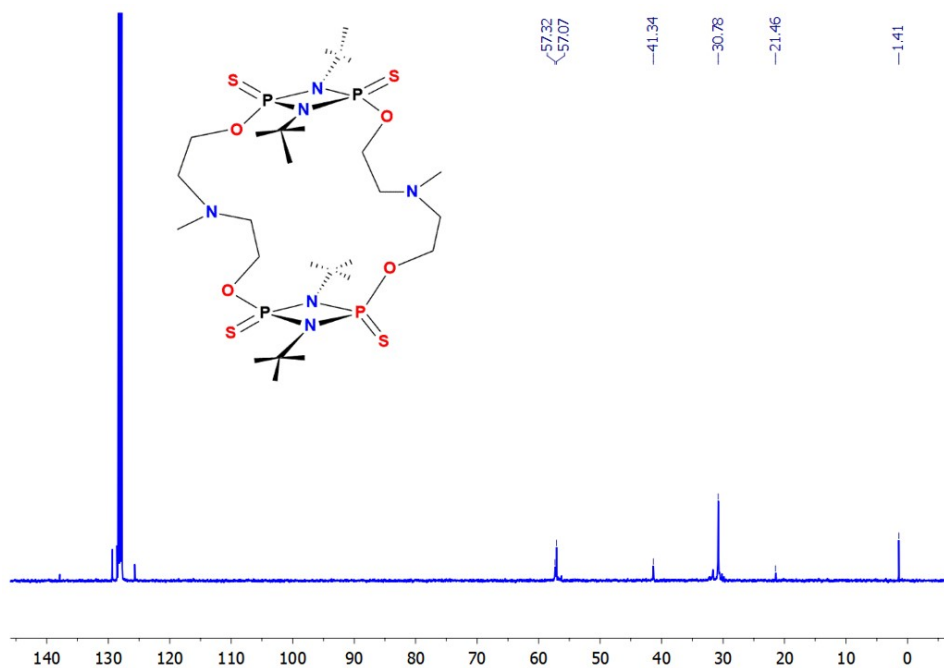

**Fig.S19**  $^{13}\text{C}\{^1\text{H}\}$  NMR (100 MHz,  $\text{C}_6\text{D}_6$ ) spectrum of  $[\{(\text{S}=\text{P}(\mu\text{-N}^t\text{Bu})\}_2\{\text{O}(\text{CH}_2)_2\text{N}(\text{Me})(\text{CH}_2)_2\text{O}\}_2]_2$  (**5**).

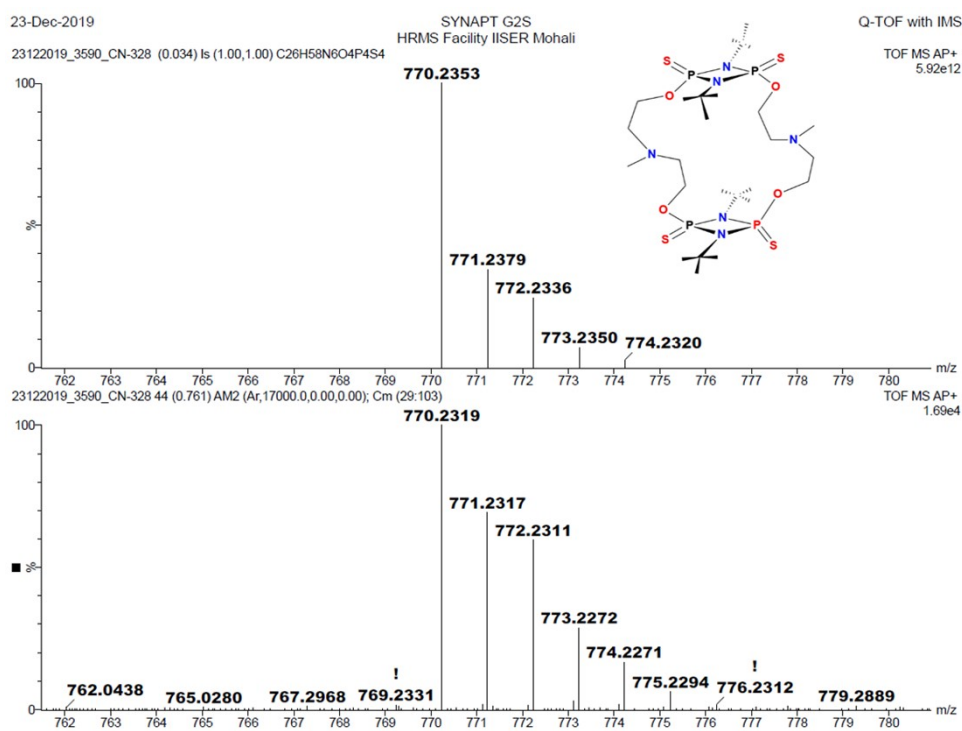

**Fig.S20** HRMS spectrum of  $[\{(\text{S}=\text{P}(\mu\text{-N}^t\text{Bu})\}_2\{\text{O}(\text{CH}_2)_2\text{N}(\text{Me})(\text{CH}_2)_2\text{O}\}_2]_2$  (**5**).

Heteronuclear NMR spectra of  $[\{(S=)P(\mu-N^tBu)\}_2\{O(CH_2)_2N(Ph)(CH_2)_2O\}]_2$  (**6**)

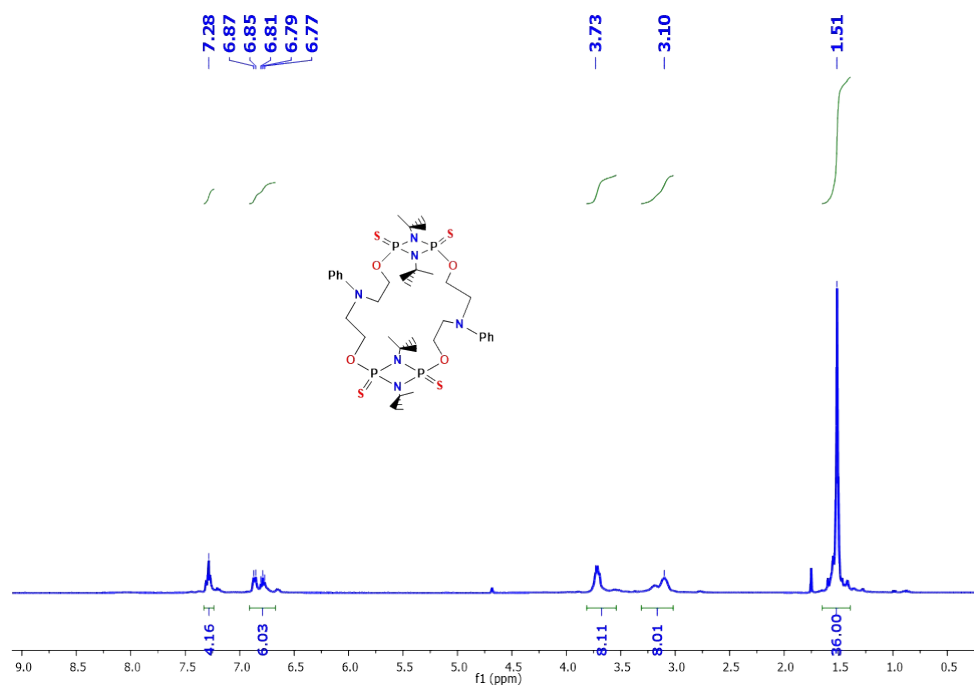

**Fig.S21**  $^1H$  NMR (400 MHz,  $CDCl_3$ ) spectrum of  $[\{(S=)P(\mu-N^tBu)\}_2\{O(CH_2)_2N(Ph)(CH_2)_2O\}]_2$  (**6**).

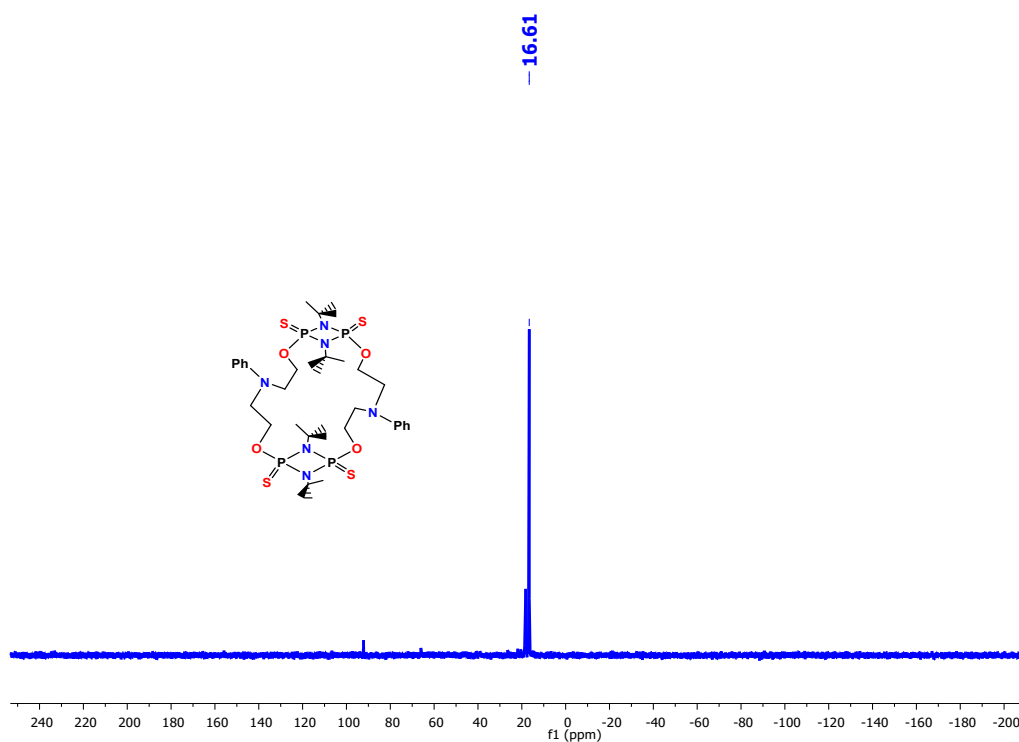

**Fig.S22**  $^{31}P\{^1H\}$  NMR (162 MHz,  $CDCl_3$ ) spectrum of  $[\{(S=)P(\mu-N^tBu)\}_2\{O(CH_2)_2N(Ph)(CH_2)_2O\}]_2$  (**6**).



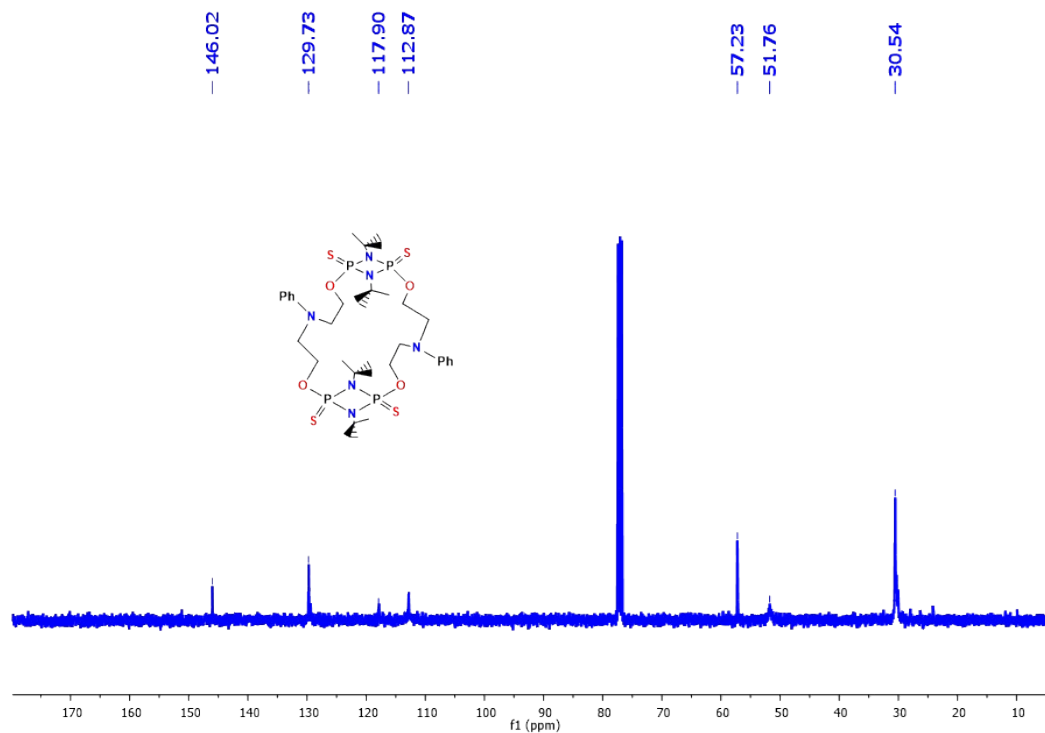

**Fig.S23**  $^{13}\text{C}\{^1\text{H}\}$  NMR (100 MHz,  $\text{CDCl}_3$ ) spectrum of  $[\{(S=)P(\mu\text{-N}^i\text{Bu})\}_2\{\text{O}(\text{CH}_2)_2\text{N}(\text{Ph})(\text{CH}_2)_2\text{O}\}]_2$  (**6**).

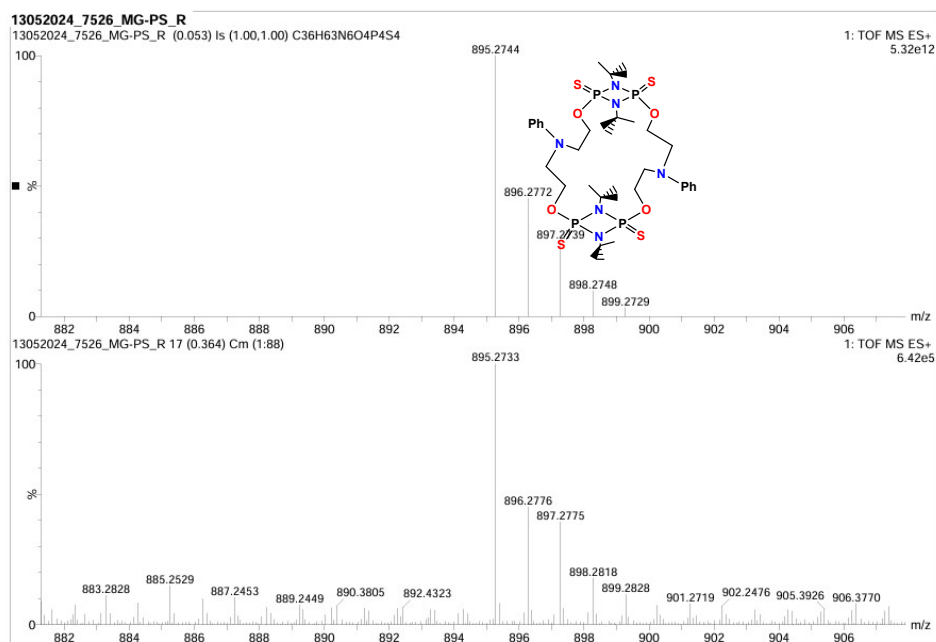

**Fig.S24** HRMS spectrum of  $[\{(S=)P(\mu\text{-N}^i\text{Bu})\}_2\{\text{O}(\text{CH}_2)_2\text{N}(\text{Ph})(\text{CH}_2)_2\text{O}\}]_2$  (**6**).

Heteronuclear NMR spectra of  $[\{(Se=P(\mu-N^tBu))_2\{O(CH_2)_2N(Me)(CH_2)_2O\}_2]_2$  (7)

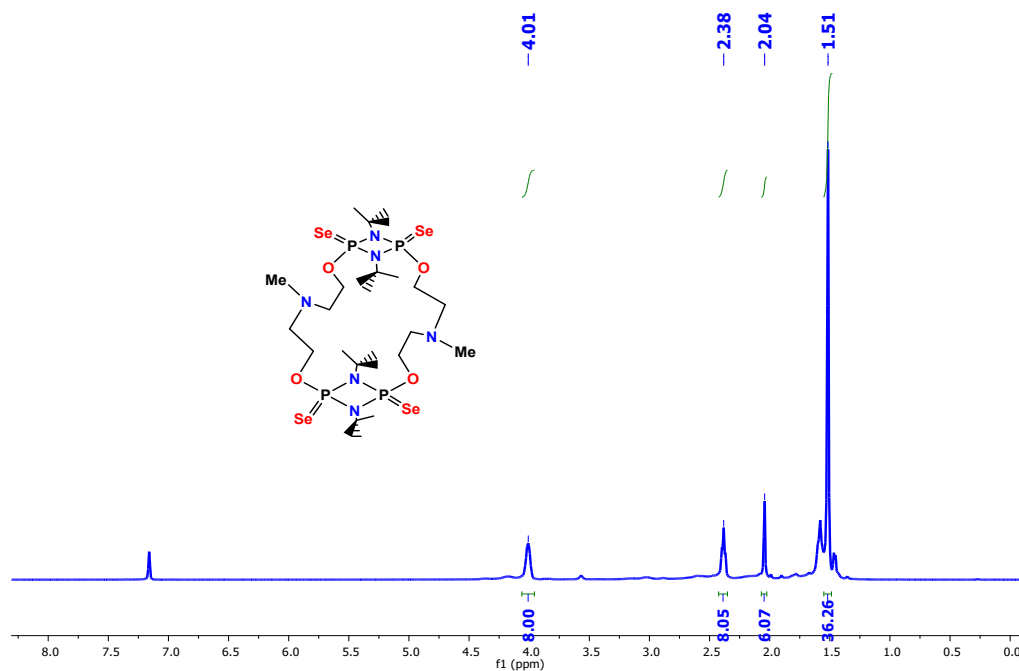

**Fig. S25**  $^1H$  NMR (400 MHz,  $C_6D_6$ ) spectrum of  $[\{(Se=P(\mu-N^tBu))_2\{O(CH_2)_2N(Me)(CH_2)_2O\}_2]_2$  (7).

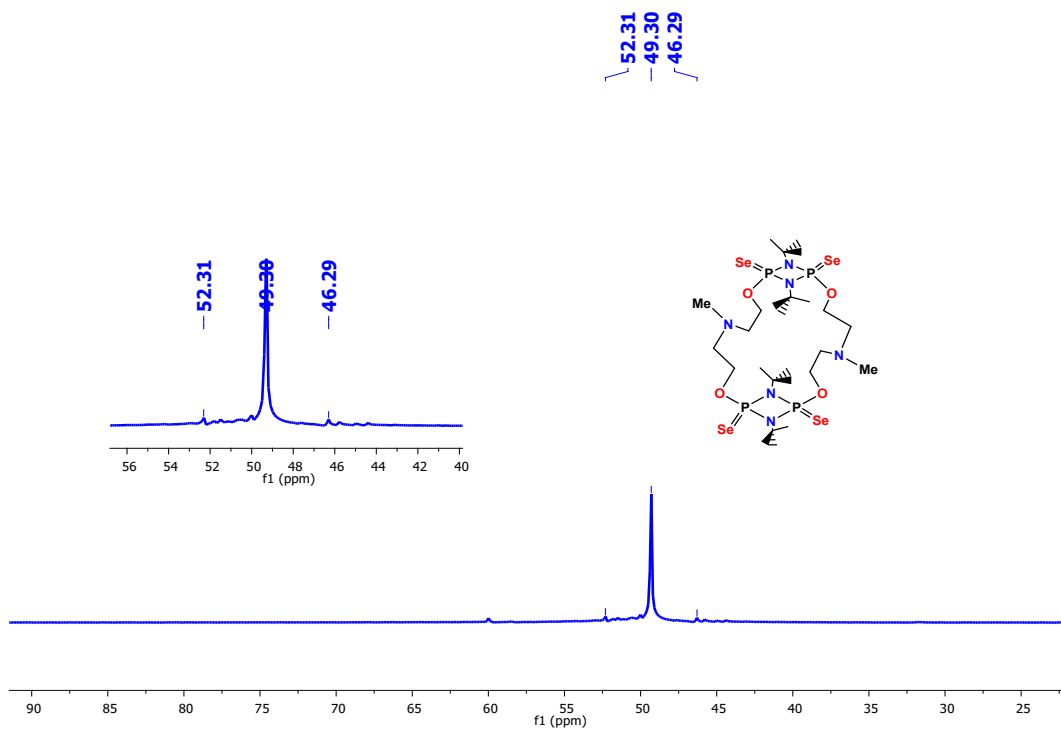

**Fig.S26**  $^{31}P$   $\{^1H\}$  NMR (162 MHz,  $C_6D_6$ ) spectrum of  $[\{(Se=P(\mu-N^tBu))_2\{O(CH_2)_2N(Me)(CH_2)_2O\}_2]_2$  (7), inset shows the satellites due to  $^{77}Se$ .

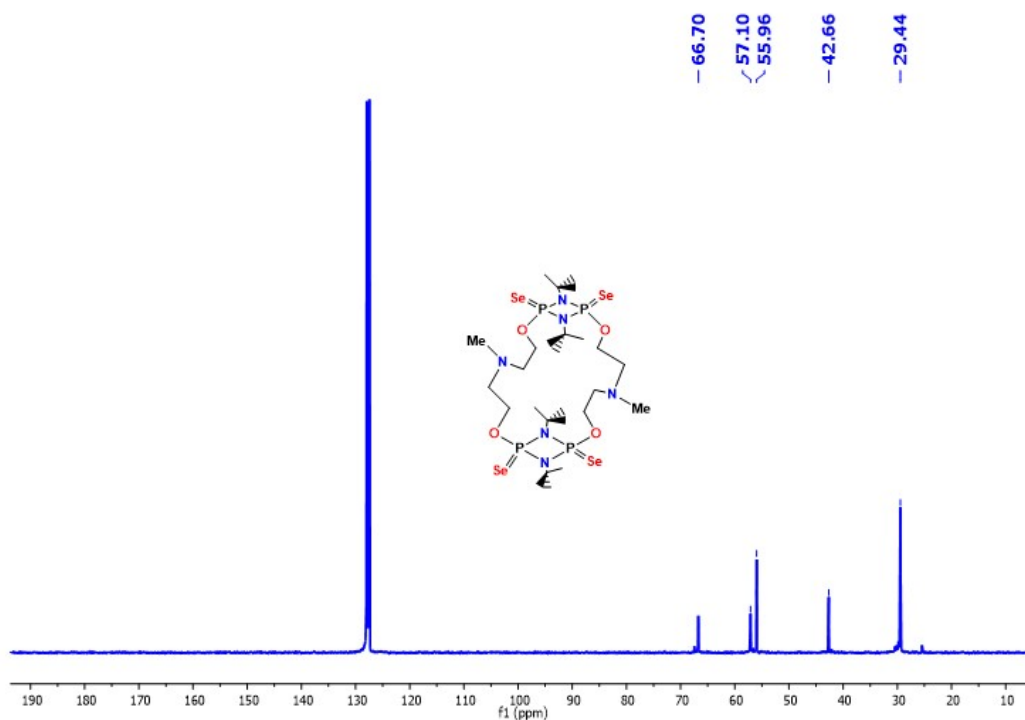

**Fig.S27**  $^{13}\text{C}\{^1\text{H}\}$  NMR (100 MHz,  $\text{C}_6\text{D}_6$ ) spectrum of  $[\{(\text{Se}=\text{P}(\mu\text{-N}^t\text{Bu})\}_2\{\text{O}(\text{CH}_2)_2\text{N}(\text{Me})(\text{CH}_2)_2\text{O}\}]_2$  (**7**).

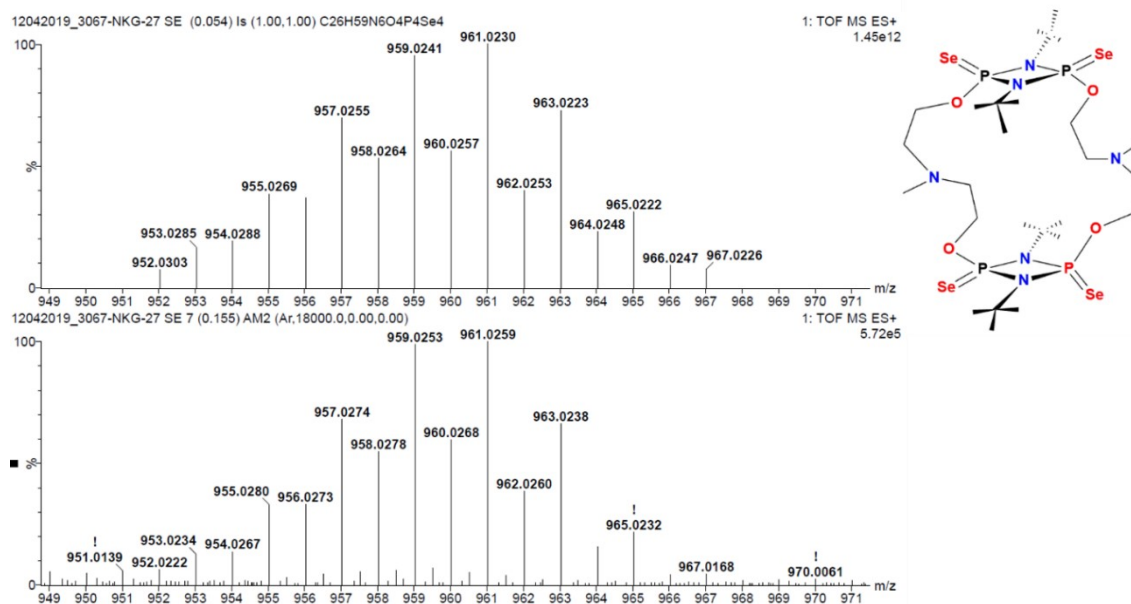

**Fig.S28** HRMS spectrum of  $[\{(\text{Se}=\text{P}(\mu\text{-N}^t\text{Bu})\}_2\{\text{O}(\text{CH}_2)_2\text{N}(\text{Me})(\text{CH}_2)_2\text{O}\}]_2$  (**7**).

Heteronuclear NMR spectra of  $[\{(Se=P(\mu-N^tBu))_2\{O(CH_2)_2N(Ph)(CH_2)_2O\}_2]_2$  (**8**)

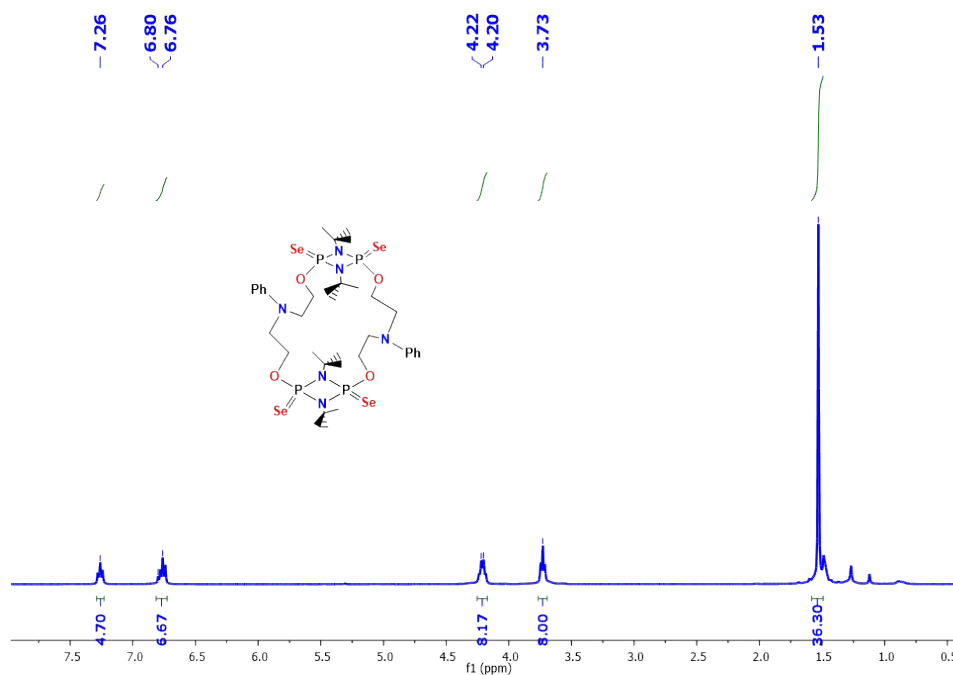

**Fig.S29**  $^1H$  NMR (400 MHz,  $CDCl_3$ ) spectrum of  $[\{(Se=P(\mu-N^tBu))_2\{O(CH_2)_2N(Ph)(CH_2)_2O\}_2]_2$  (**8**).

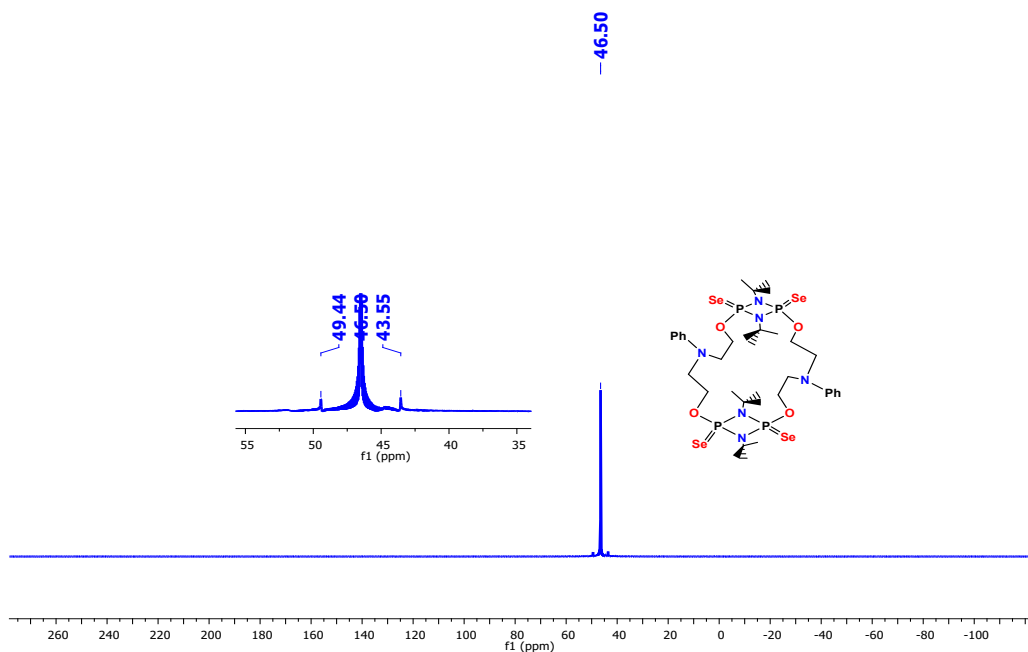

**Fig.S30**  $^{31}P\{^1H\}$  NMR (162 MHz,  $CDCl_3$ ) spectrum of  $[\{(Se=P(\mu-N^tBu))_2\{O(CH_2)_2N(Ph)(CH_2)_2O\}_2]_2$  (**8**), inset shows the satellites due to  $^{77}Se$ .

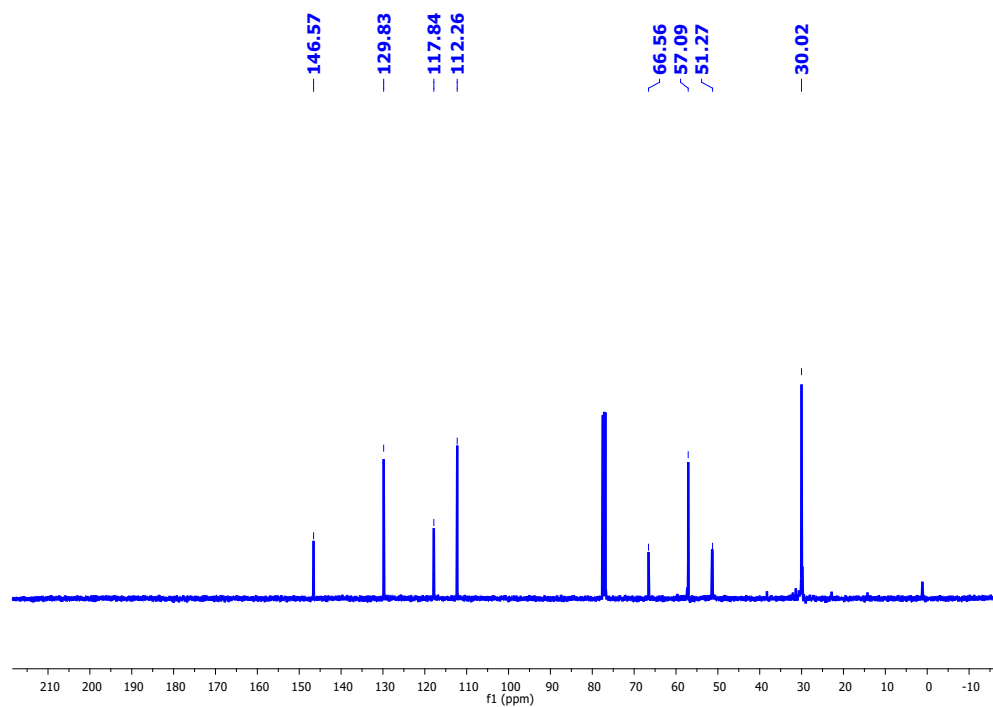

**Fig.S31**  $^{13}\text{C}\{^1\text{H}\}$  NMR (100 MHz,  $\text{CDCl}_3$ ) spectrum of  $[\{(\text{Se}=\text{P}(\mu\text{-N}^t\text{Bu})\}_2\{\text{O}(\text{CH}_2)_2\text{N}(\text{Ph})(\text{CH}_2)_2\text{O}\}_2]$  (**8**).

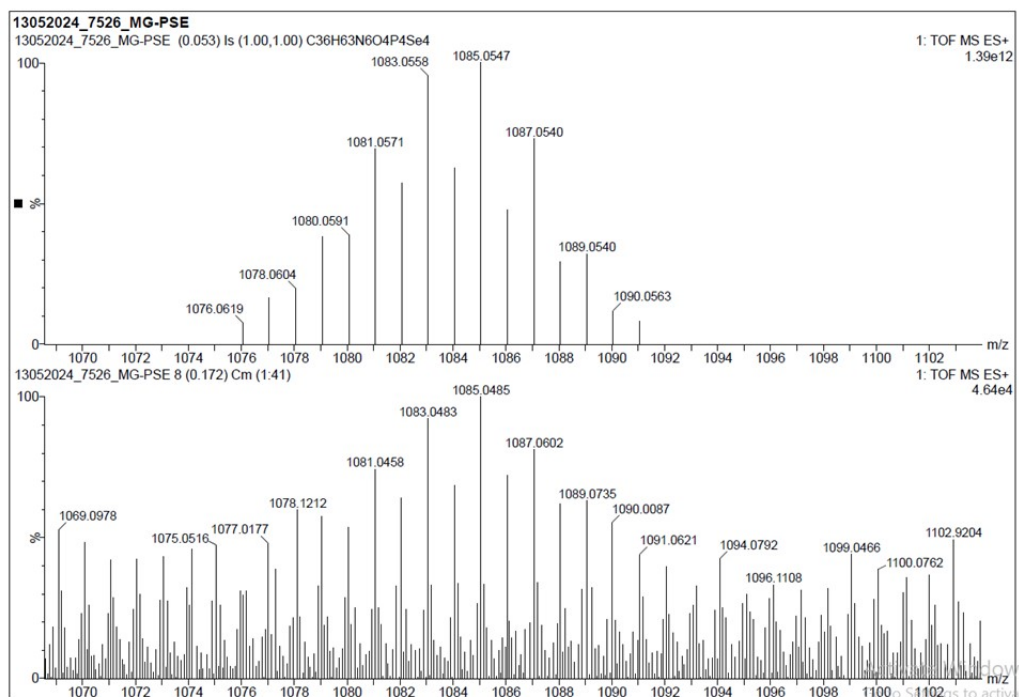

**Fig.S32** HRMS spectrum of  $[\{(\text{Se}=\text{P}(\mu\text{-N}^t\text{Bu})\}_2\{\text{O}(\text{CH}_2)_2\text{N}(\text{Ph})(\text{CH}_2)_2\text{O}\}_2]$  (**8**).

Heteronuclear NMR spectra of  $[\{(\text{BH}_3)\text{P}(\mu\text{-N}^t\text{Bu})\}_2\{\text{O}(\text{CH}_2)_2\text{N}(\text{BH}_3)(\text{Me})(\text{CH}_2)_2\text{O}\}]_2$  (**9**)

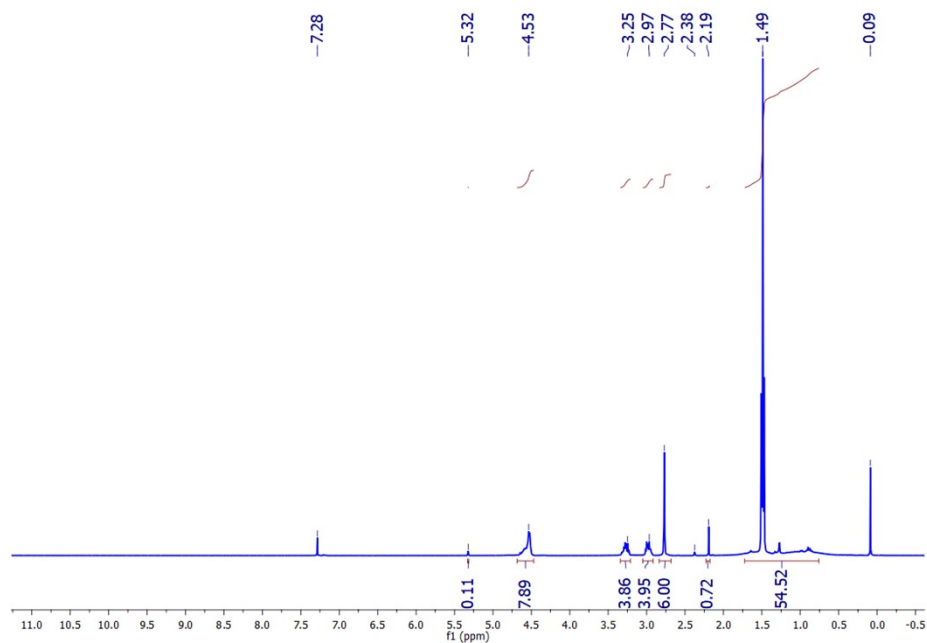

**Fig.S33**  $^1\text{H}$  NMR (400 MHz,  $\text{CDCl}_3$ ) spectrum of  $[\{(\text{BH}_3)\text{P}(\mu\text{-N}^t\text{Bu})\}_2\{\text{O}(\text{CH}_2)_2\text{N}(\text{BH}_3)(\text{Me})(\text{CH}_2)_2\text{O}\}]_2$  (**9**).

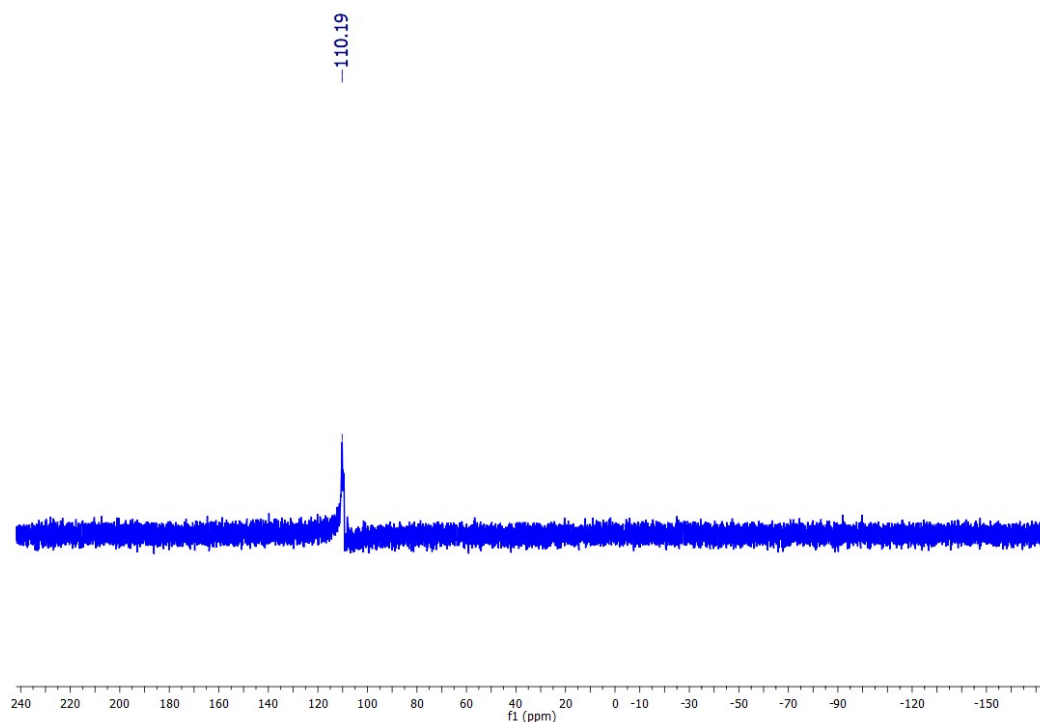

**Fig.S34**  $^{31}\text{P}\{^1\text{H}\}$  NMR (162 MHz,  $\text{CDCl}_3$ ) spectrum of  $[\{(\text{BH}_3)\text{P}(\mu\text{-N}^t\text{Bu})\}_2\{\text{O}(\text{CH}_2)_2\text{N}(\text{BH}_3)(\text{Me})(\text{CH}_2)_2\text{O}\}]_2$  (**9**).

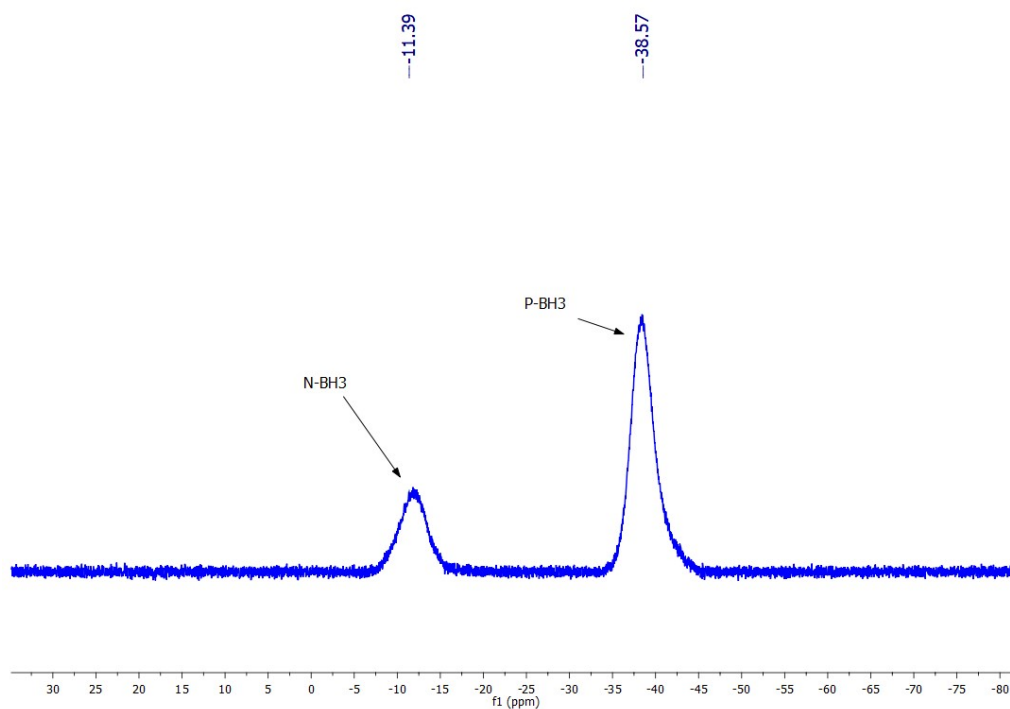

**Fig.S35**  $^{11}\text{B}$  NMR (128.4 MHz,  $\text{CDCl}_3$ ) spectrum of  $[\{(\text{BH}_3)\text{P}(\mu\text{-N}^t\text{Bu})\}_2\{\text{O}(\text{CH}_2)_2\text{N}(\text{BH}_3)(\text{Me})(\text{CH}_2)_2\text{O}\}]_2$  (**9**).

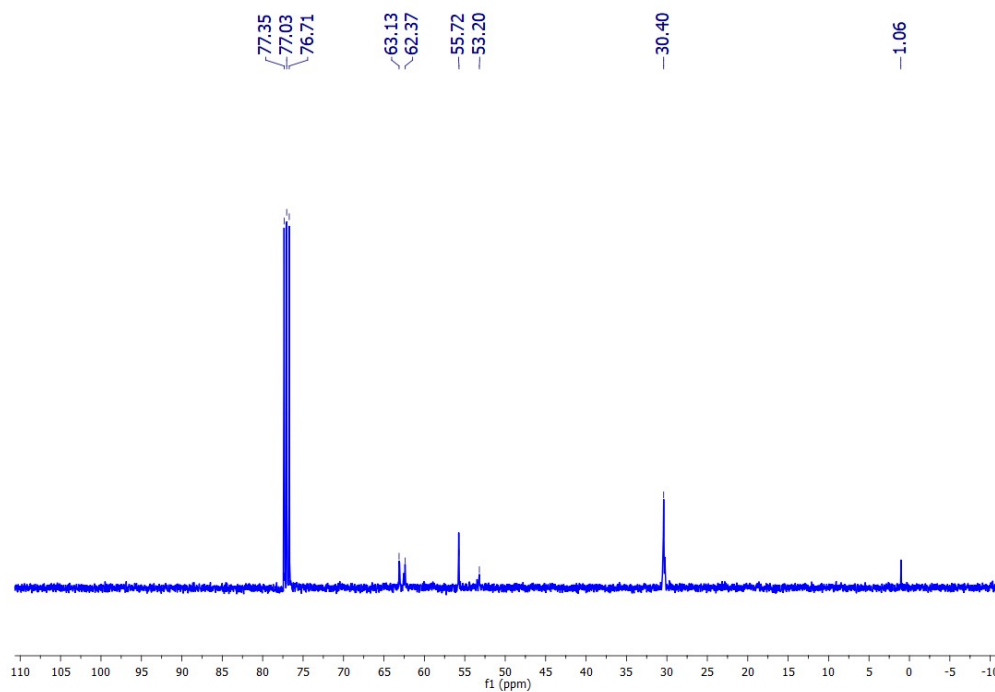

**Fig.S36**  $^{13}\text{C}\{^1\text{H}\}$  NMR (100 MHz,  $\text{CDCl}_3$ ) spectrum of  $[\{(\text{BH}_3)\text{P}(\mu\text{-N}^t\text{Bu})\}_2\{\text{O}(\text{CH}_2)_2\text{N}(\text{BH}_3)(\text{Me})(\text{CH}_2)_2\text{O}\}]_2$  (**9**).

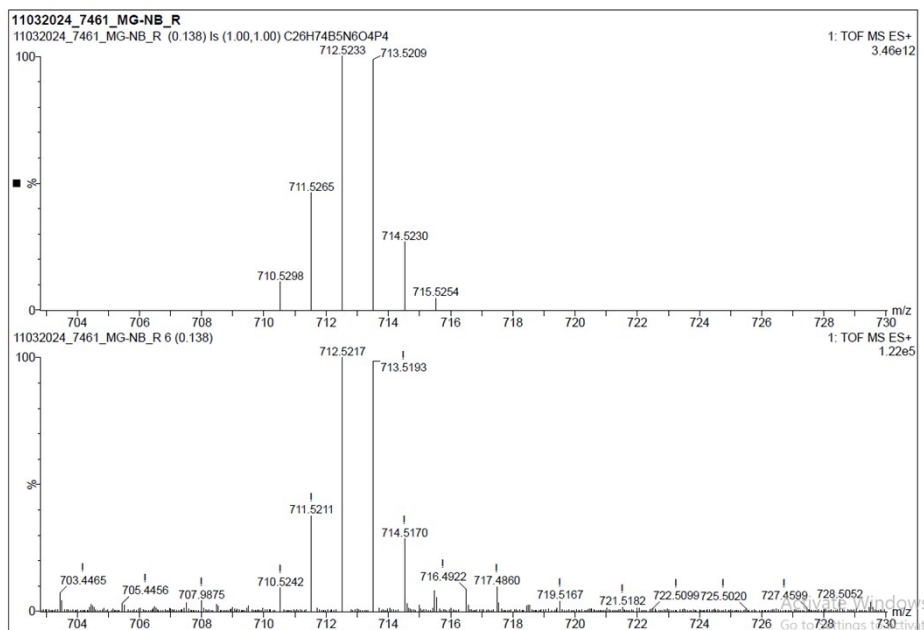

**Fig.S37** HRMS spectrum of  $[\{(\text{BH}_3)\text{P}(\mu\text{-N}^t\text{Bu})\}_2\{\text{O}(\text{CH}_2)_2\text{N}(\text{BH}_3)(\text{Me})(\text{CH}_2)_2\text{O}\}]_2$  (**9**).

**Heteronuclear NMR spectra of  $[\{(\text{BH}_3)\text{P}(\mu\text{-N}^t\text{Bu})\}_2\{\text{O}(\text{CH}_2)_2\text{N}(\text{Ph})(\text{CH}_2)_2\text{O}\}]_2$  (**10**)**

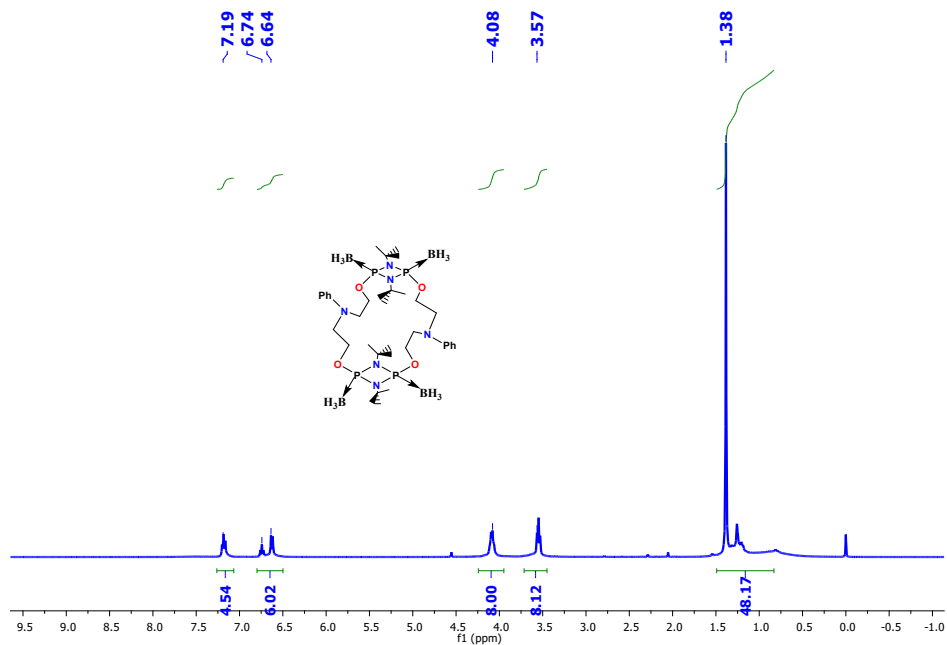

**Fig.S38**  $^1\text{H}$  NMR (400 MHz,  $\text{CDCl}_3$ ) spectrum of  $[\{(\text{BH}_3)\text{P}(\mu\text{-N}^t\text{Bu})\}_2\{\text{O}(\text{CH}_2)_2\text{N}(\text{Ph})(\text{CH}_2)_2\text{O}\}]_2$  (**10**).



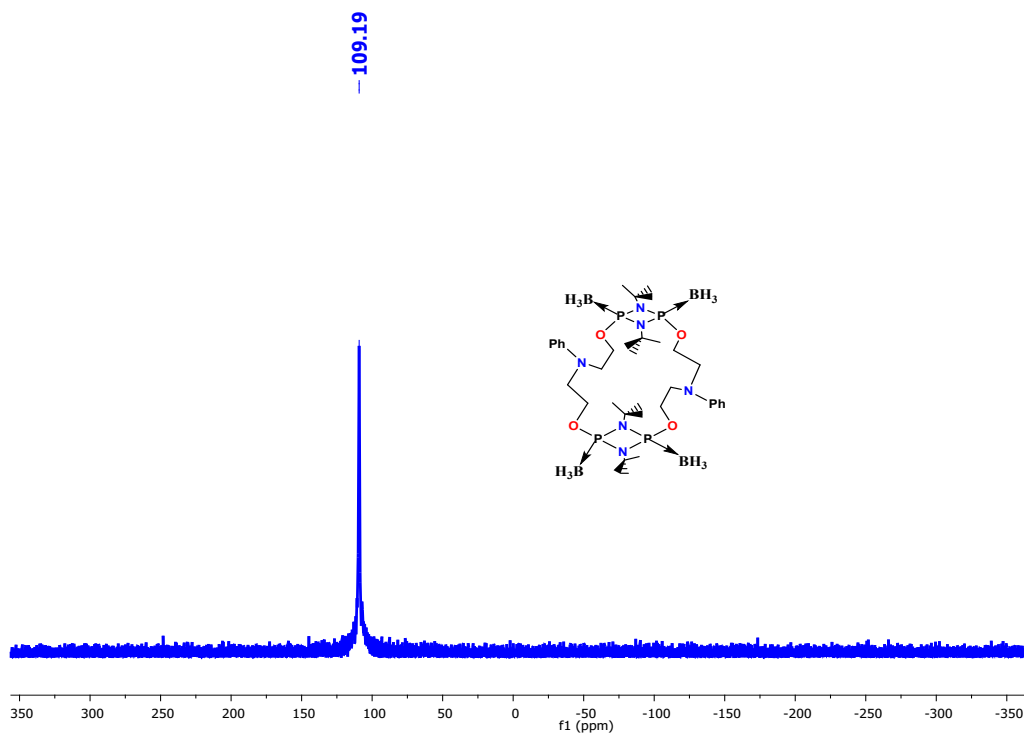

**Fig.S39**  $^{31}\text{P}\{^1\text{H}\}$  NMR (162 MHz,  $\text{CDCl}_3$ ) spectrum of  $[\{(\text{BH}_3)\text{P}(\mu\text{-N}^t\text{Bu})\}_2\{\text{O}(\text{CH}_2)_2\text{N}(\text{Ph})(\text{CH}_2)_2\text{O}\}]_2$  (**10**).

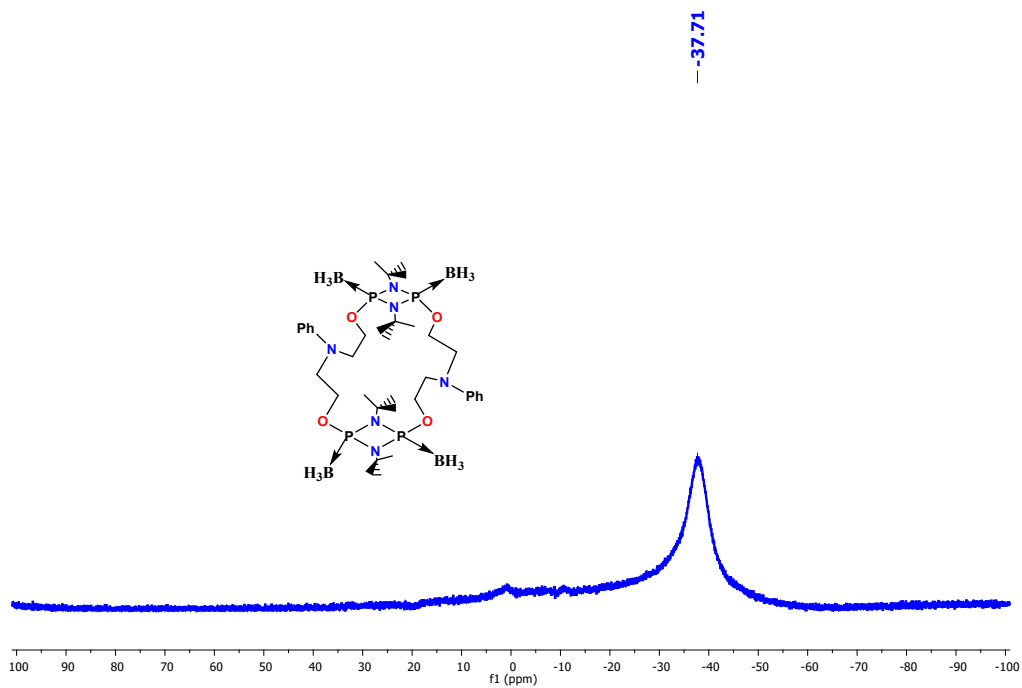

**Fig.S40**  $^{11}\text{B}$  NMR (128.4 MHz,  $\text{CDCl}_3$ ) spectrum of  $[\{(\text{BH}_3)\text{P}(\mu\text{-N}^t\text{Bu})\}_2\{\text{O}(\text{CH}_2)_2\text{N}(\text{Ph})(\text{CH}_2)_2\text{O}\}]_2$  (**10**).

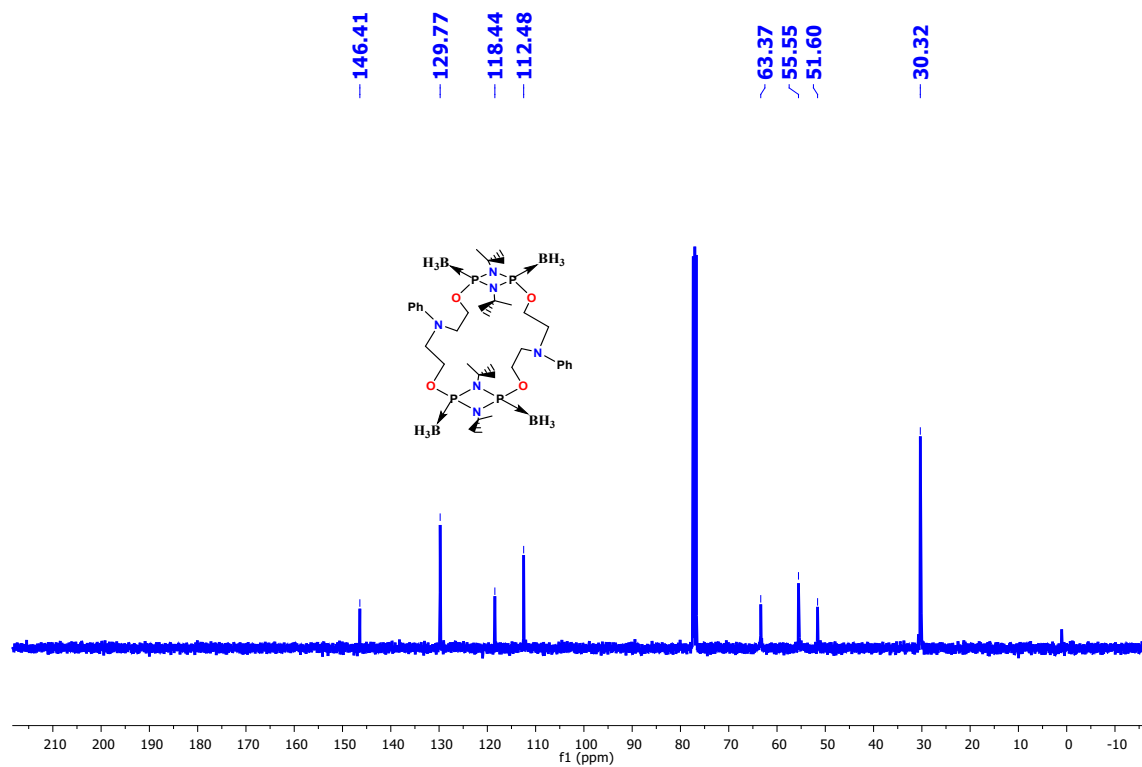

**Fig.S41**  $^{13}\text{C}\{^1\text{H}\}$  NMR (100 MHz,  $\text{CDCl}_3$ ) spectrum of  $[\{(\text{BH}_3)\text{P}(\mu\text{-N}^t\text{Bu})\}_2\{\text{O}(\text{CH}_2)_2\text{N}(\text{Ph})(\text{CH}_2)_2\text{O}\}]_2$  (**10**).

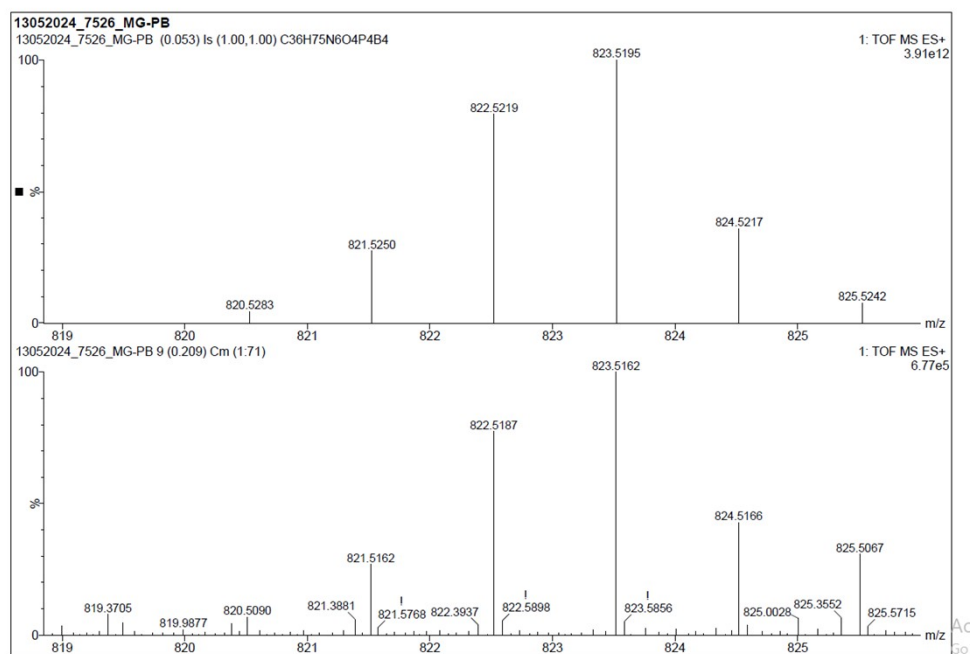

**Fig.S42** HRMS spectrum of  $[\{(\text{BH}_3)\text{P}(\mu\text{-N}^t\text{Bu})\}_2\{\text{O}(\text{CH}_2)_2\text{N}(\text{Ph})(\text{CH}_2)_2\text{O}\}]_2$  (**10**).

## 2. Crystal Data and Refinement Details of Compounds 1-3, 8 and 9

Single-crystal X-ray diffraction data for macrocycles **1-3**, **8**, and **9** were collected on a Rigaku XtaLAB mini diffractometer equipped with a Mercury375M CCD detector. Data were acquired using MoK $\alpha$  radiation ( $\lambda = 0.71073 \text{ \AA}$ ) *via* omega scans. The detector distance was maintained at 49.9 mm throughout the data collection, and the detector was positioned at a fixed  $2\theta$  angle of  $29.85^\circ$  for all datasets. Data collection and reduction were performed using CrysAlisPro 1.171.38.46. The crystal structures were solved using the OLEX2<sup>1</sup> package with the SHELXT algorithm<sup>2</sup>, and the refinement was carried out using SHELXL<sup>3</sup>. All non-hydrogen atoms were refined anisotropically. All the H and D atoms were geometrically fixed and refined using the riding model. Figures were generated using Mercury 2020.3.0. Geometric data were extracted from the CIF.

The asymmetric unit of compound **1** contains half of the molecule of macrocycle, and the other half is generated by inversion symmetry.

The asymmetric unit of compound **2** contains half of the molecule of macrocycle, and the other half is generated by inversion symmetry. One of the <sup>t</sup>Bu groups in **2** was found to be disordered. These disordered atoms were refined with the use of PART and EADP commands.

The asymmetric unit of compound **3** consists of two distinct half molecules along with two molecules of THF and two molecules of the *m*-chlorobenzoic acid in the crystal lattice. Further analysis revealed that one THF moiety exhibited static disorder, which was effectively addressed using the PART and EADP commands.

The asymmetric unit of compound **8** contains half of the molecule of macrocycle along with a C<sub>6</sub>D<sub>6</sub> molecule, and another half is generated by inversion symmetry.

The asymmetric unit of compound **9** contains half of the molecule of macrocyclic borane-adduct along with a DCM molecule and an uncharacterized solvent molecule in the crystal lattice. DCM molecule in **9** was found to be disordered. These disordered atoms were refined using the appropriate PART, EADP, and EXYZ commands. While there were attempts to model the structure of the unknown solvent molecule in **9**, we were not able to unequivocally refine it, so it was masked using the OLEX2<sup>1</sup>. A solvent mask calculates 20 electrons and 58 ( $\text{\AA}^3$ ) of volume in a unit cell in an asymmetric unit.

**Table 1.** Crystallographic data for compounds **1**, **2**, **3**, **8**, and **9**.

| Compound <sup>[a]</sup>                                     | <b>1</b>                                                                     | <b>2</b>                                                                     | <b>3</b> ·(THF) <sub>2</sub> ( <i>m</i> -Cl-C <sub>6</sub> H <sub>5</sub> O <sub>2</sub> ) <sub>2</sub> | <b>8</b> ·(C <sub>6</sub> D <sub>6</sub> ) <sub>2</sub>                                                      | <b>9</b> ·(CH <sub>2</sub> Cl <sub>2</sub> ) <sub>2</sub>                                                   |
|-------------------------------------------------------------|------------------------------------------------------------------------------|------------------------------------------------------------------------------|---------------------------------------------------------------------------------------------------------|--------------------------------------------------------------------------------------------------------------|-------------------------------------------------------------------------------------------------------------|
| Chemical formula                                            | C <sub>26</sub> H <sub>58</sub> N <sub>6</sub> O <sub>4</sub> P <sub>4</sub> | C <sub>36</sub> H <sub>62</sub> N <sub>6</sub> O <sub>4</sub> P <sub>4</sub> | C <sub>48</sub> H <sub>84</sub> Cl <sub>2</sub> N <sub>6</sub> O <sub>14</sub> P <sub>4</sub>           | C <sub>48</sub> H <sub>62</sub> D <sub>12</sub> N <sub>6</sub> O <sub>4</sub> P <sub>4</sub> Se <sub>4</sub> | C <sub>28</sub> H <sub>80</sub> N <sub>6</sub> O <sub>4</sub> P <sub>4</sub> B <sub>6</sub> Cl <sub>4</sub> |
| Molar mass                                                  | 642.66                                                                       | 766.79                                                                       | 1163.99                                                                                                 | 1250.92                                                                                                      | 895.52                                                                                                      |
| Crystal system                                              | monoclinic                                                                   | triclinic                                                                    | triclinic                                                                                               | monoclinic                                                                                                   | monoclinic                                                                                                  |
| Space group                                                 | <i>P</i> 2 <sub>1</sub> / <i>c</i>                                           | <i>P</i> $\bar{1}$                                                           | <i>P</i> $\bar{1}$                                                                                      | <i>P</i> 2 <sub>1</sub> / <i>c</i>                                                                           | <i>P</i> 2 <sub>1</sub> / <i>n</i>                                                                          |
| T [K]                                                       | 100.00                                                                       | 250.01(10)                                                                   | 99.99(10)                                                                                               | 200.00(10)                                                                                                   | 293(2)                                                                                                      |
| a [Å]                                                       | 9.4422(16)                                                                   | 9.4064(5)                                                                    | 14.2255(7)                                                                                              | 13.0929(8)                                                                                                   | 9.4889(7)                                                                                                   |
| b [Å]                                                       | 18.041(3)                                                                    | 9.6314(6)                                                                    | 15.05329(7)                                                                                             | 13.8043(7)                                                                                                   | 17.3728(11)                                                                                                 |
| c [Å]                                                       | 12.769(2)                                                                    | 12.6177(7)                                                                   | 15.8213(8)                                                                                              | 16.9771(13)                                                                                                  | 16.2634(10)                                                                                                 |
| α [°]                                                       | 90                                                                           | 74.121(5)                                                                    | 94.818(4)                                                                                               | 90                                                                                                           | 90                                                                                                          |
| β [°]                                                       | 126.539(2)                                                                   | 82.724(5)                                                                    | 99.230(4)                                                                                               | 111.913(8)                                                                                                   | 93.963(6)                                                                                                   |
| γ [°]                                                       | 90                                                                           | 83.213(5)                                                                    | 115.342(4)                                                                                              | 90                                                                                                           | 90                                                                                                          |
| V [Å <sup>3</sup> ]                                         | 1747.6(5)                                                                    | 1086.46(11)                                                                  | 2977.7(3)                                                                                               | 2846.7(3)                                                                                                    | 2674.6(3)                                                                                                   |
| Z                                                           | 2                                                                            | 1                                                                            | 2                                                                                                       | 2                                                                                                            | 2                                                                                                           |
| ρ (calcd.) [g·cm <sup>-3</sup> ]                            | 1.225                                                                        | 1.172                                                                        | 1.298                                                                                                   | 1.459                                                                                                        | 1.112                                                                                                       |
| μ(Mo-K <sub>α</sub> ) [mm <sup>-1</sup> ]                   | 0.255                                                                        | 0.215                                                                        | 0.280                                                                                                   | 2.735                                                                                                        | 0.375                                                                                                       |
| Reflections collected                                       | 7398                                                                         | 13771                                                                        | 36012                                                                                                   | 10513                                                                                                        | 19466                                                                                                       |
| Independent reflections                                     | 3039                                                                         | 3838                                                                         | 10511                                                                                                   | 5045                                                                                                         | 4738                                                                                                        |
| Data/restraints/parameters                                  | 3039/0/188                                                                   | 3838/0/220                                                                   | 10511/1/661                                                                                             | 5045/0/274                                                                                                   | 4738/12/276                                                                                                 |
| R <sub>1</sub> , wR <sub>2</sub> [I > 2σ(I)] <sup>[a]</sup> | 0.0636, 0.1891                                                               | 0.0813, 0.2108                                                               | 0.0716, 0.1884                                                                                          | 0.0516, 0.1413                                                                                               | 0.0801, 0.2126                                                                                              |
| R <sub>1</sub> , wR <sub>2</sub> (all data) <sup>[a]</sup>  | 0.0682, 0.1919                                                               | 0.1129, 0.2518                                                               | 0.1019, 0.2351                                                                                          | 0.0710, 0.1620                                                                                               | 0.1069, 0.2466                                                                                              |
| GOF                                                         | 1.098                                                                        | 1.061                                                                        | 1.053                                                                                                   | 1.087                                                                                                        | 1.058                                                                                                       |
| CCDC No.                                                    | <b>2403424</b>                                                               | <b>2403425</b>                                                               | <b>2403426</b>                                                                                          | <b>2403427</b>                                                                                               | <b>2403428</b>                                                                                              |

[a] R<sub>1</sub> = Σ ||F<sub>o</sub> - |F<sub>c</sub>|| / Σ |F<sub>o</sub>|, wR<sub>2</sub> = [Σw(|F<sub>o</sub><sup>2</sup> - |F<sub>c</sub><sup>2</sup>||)<sup>2</sup> / Σw|F<sub>o</sub><sup>2</sup>|]<sup>1/2</sup>

### 3. References:

1. O. V. Dolomanov, L. J. Bourhis, R. J. Gildea, J. A. K. Howard, and H. Puschmann, *J. Appl. Cryst.* 2009, **42**, 339-341.
2. G. M. Sheldrick, *Acta Cryst., Sect. A*, 2015, **71**, 3-8.
3. G. M. Sheldrick, *Acta Cryst., Sect. A*, 2008, **64**, 112-122
